# Supplementary material for: Global Burden and Improvement Gap of Non-Rheumatic Calcific Aortic Valve Disease: 1990–2019 Findings from Global Burden of Disease Study 2019
Source: MDPI journal article supplement (doi:10.3390/jcm11226733), 2022-11-14
Supplement: s1 [file s1]

Table S1. The prevalence cases and age-standardised prevalence rate of non-rheumatic calcific aortic valve disease in 1990 and 2019, and their temporal trends from 1990 to 2019 in 204 countries and territories.

|                     | 1990                   |                                    | 2019                         |                                    | 1990–2019                          | 1990–2019                |
|---------------------|------------------------|------------------------------------|------------------------------|------------------------------------|------------------------------------|--------------------------|
|                     | Cases<br>No. (95% UI)  | ASPR (per 100,000)<br>No. (95% UI) | Cases<br>No. (95% UI)        | ASPR (per 100,000)<br>No. (95% UI) | ASPR Percentage change<br>(95% UI) | AAPC No.<br>(95% CI)     |
| Afghanistan         | 61<br>(46 to 79)       | 0.78<br>(0.6 to 1.02)              | 170<br>(125 to 228)          | 1.04<br>(0.8 to 1.34)              | 32.63<br>(20.02 to 49.67)          | 0.97<br>(0.91 to 1.04)   |
| Albania             | 654<br>(543 to 782)    | 31.31<br>(26.06 to 37.57)          | 10142<br>(8377 to 12306)     | 239.18<br>(199.2 to 289.35)        | 663.82<br>(555.89 to 780.35)       | 7.25<br>(7.12 to 7.39)   |
| Algeria             | 403<br>(311 to 503)    | 2.92<br>(2.28 to 3.66)             | 1729<br>(1337 to 2185)       | 4.64<br>(3.63 to 5.84)             | 58.97<br>(41.87 to 81.11)          | 1.59<br>(1.5 to 1.69)    |
| American Samoa      | 9<br>(7 to 11)         | 45.2<br>(35.49 to 57.11)           | 91<br>(72 to 114)            | 195.91<br>(153.9 to 245.53)        | 333.44<br>(252.1 to 439.83)        | 4.26<br>(3.25 to 5.29)   |
| Andorra             | 4<br>(3 to 5)          | 7.18<br>(5.66 to 9.14)             | 237<br>(180 to 295)          | 171.77<br>(130.03 to 213.02)       | 2291.79<br>(1718.67 to 2916.39)    | 11.83<br>(10.38 to 13.3) |
| Angola              | 40<br>(30 to 51)       | 0.91<br>(0.72 to 1.13)             | 149<br>(115 to 190)          | 1.2<br>(0.95 to 1.5)               | 31.79<br>(19.72 to 44.76)          | 0.97<br>(0.94 to 1)      |
| Antigua and Barbuda | 3<br>(3 to 4)          | 6.4<br>(5.23 to 7.74)              | 31<br>(26 to 37)             | 29.65<br>(24.38 to 35.08)          | 363<br>(299.79 to 441.26)          | 5.33<br>(5.21 to 5.46)   |
| Argentina           | 3539<br>(2751 to 4664) | 10.96<br>(8.53 to 14.45)           | 55367<br>(47036 to 66507)    | 102.43<br>(86.97 to 122.81)        | 834.79<br>(638.81 to 1056.96)      | 7.75<br>(7.54 to 7.96)   |
| Armenia             | 142<br>(108 to 182)    | 5.05<br>(3.89 to 6.4)              | 2288<br>(1859 to 2807)       | 55.18<br>(44.9 to 67.49)           | 993.28<br>(787.84 to 1225.04)      | 8.78<br>(8.29 to 9.27)   |
| Australia           | 6565<br>(5425 to 7893) | 33.21<br>(27.6 to 39.89)           | 288497<br>(243985 to 345487) | 695.19<br>(590.19 to 832.23)       | 1993.12<br>(1667.94 to 2369.86)    | 11.05<br>(10.9 to 11.19) |
| Austria             | 6099<br>(5184 to 7207) | 52.03<br>(44.12 to 61.23)          | 121170<br>(104958 to 137387) | 668.14<br>(576.67 to 759.72)       | 1184.11<br>(1012.09 to 1417.75)    | 9.57<br>(9.19 to 9.96)   |
| Azerbaijan          | 249<br>(186 to 328)    | 4.86<br>(3.63 to 6.28)             | 4647<br>(3661 to 5739)       | 45.27<br>(36.12 to 55.52)          | 831.6<br>(651.93 to 1060.38)       | 8.15<br>(7.75 to 8.55)   |
| Bahamas             | 14                     | 8.71                               | 156                          | 38.24                              | 338.99                             | 5.41                     |

|                                  |                        |                           |                           |                              |                                |                        |
|----------------------------------|------------------------|---------------------------|---------------------------|------------------------------|--------------------------------|------------------------|
|                                  | (12 to 17)             | (7.08 to 10.42)           | (128 to 187)              | (31.29 to 45.62)             | (286.24 to 399.16)             | (5.12 to 5.71)         |
| Bahrain                          | 52<br>(39 to 66)       | 19.08<br>(14.93 to 23.99) | 603<br>(457 to 768)       | 40.24<br>(31.18 to 50.8)     | 110.95<br>(90.65 to 134.2)     | 2.82<br>(2.56 to 3.09) |
| Bangladesh                       | 565<br>(434 to 731)    | 1.09<br>(0.85 to 1.4)     | 2240<br>(1745 to 2815)    | 1.64<br>(1.28 to 2.04)       | 49.93<br>(34.71 to 68.32)      | 1.32<br>(1.19 to 1.45) |
| Barbados                         | 35<br>(29 to 41)       | 12.59<br>(10.35 to 15)    | 276<br>(222 to 332)       | 57.18<br>(46.41 to 68.28)    | 354.31<br>(293.14 to 426.36)   | 5.3<br>(4.99 to 5.61)  |
| Belarus                          | 3026<br>(2368 to 3726) | 23.35<br>(18.4 to 28.59)  | 35854<br>(28628 to 44269) | 229.73<br>(183.94 to 280.39) | 883.76<br>(760.78 to 1033.67)  | 8.36<br>(8.12 to 8.6)  |
| Belgium                          | 517<br>(407 to 666)    | 3.35<br>(2.62 to 4.33)    | 8836<br>(6944 to 11221)   | 39<br>(30.82 to 48.99)       | 1063.62<br>(860.09 to 1358.13) | 8.62<br>(7.58 to 9.67) |
| Belize                           | 5<br>(4 to 6)          | 5.17<br>(4.13 to 6.34)    | 125<br>(100 to 160)       | 42.7<br>(33.9 to 55.26)      | 725.3<br>(583.1 to 959.67)     | 7.59<br>(6.56 to 8.63) |
| Benin                            | 24<br>(19 to 31)       | 1.08<br>(0.85 to 1.34)    | 99<br>(76 to 128)         | 1.65<br>(1.27 to 2.08)       | 52.75<br>(36.47 to 72.02)      | 1.32<br>(1.14 to 1.51) |
| Bermuda                          | 34<br>(27 to 42)       | 53.42<br>(42.76 to 65.48) | 347<br>(291 to 414)       | 274.8<br>(231.59 to 328.97)  | 414.37<br>(324.24 to 531.07)   | 5.75<br>(5.67 to 5.83) |
| Bhutan                           | 4<br>(3 to 6)          | 1.58<br>(1.22 to 2.03)    | 30<br>(22 to 40)          | 4.95<br>(3.67 to 6.65)       | 213.01<br>(158.37 to 300.94)   | 3.93<br>(3.53 to 4.32) |
| Bolivia (Plurinational State of) | 87<br>(70 to 108)      | 2.49<br>(2 to 3.06)       | 1442<br>(1184 to 1735)    | 15.7<br>(12.98 to 19.01)     | 531.34<br>(443.09 to 637.31)   | 6.6<br>(6.47 to 6.73)  |
| Bosnia and Herzegovina           | 1613<br>(1300 to 1965) | 40.23<br>(32.33 to 48.85) | 17469<br>(14381 to 21150) | 294.68<br>(245.88 to 354.85) | 632.4<br>(528.55 to 761.53)    | 7.21<br>(6.53 to 7.89) |
| Botswana                         | 10<br>(8 to 12)        | 1.58<br>(1.26 to 1.96)    | 90<br>(68 to 114)         | 5.98<br>(4.64 to 7.49)       | 278.23<br>(220.85 to 345.74)   | 4.66<br>(4.39 to 4.93) |
| Brazil                           | 7905<br>(6333 to 9659) | 7.85<br>(6.26 to 9.62)    | 57153<br>(45927 to 70348) | 23.7<br>(19.11 to 29)        | 201.79<br>(177.49 to 231.77)   | 3.77<br>(3.66 to 3.88) |
| Brunei Darussalam                | 67<br>(53 to 83)       | 62.64<br>(48.9 to 79.56)  | 899<br>(748 to 1089)      | 289.41<br>(246.36 to 342.68) | 362.04<br>(298.27 to 458.24)   | 5.47<br>(5.3 to 5.65)  |
| Bulgaria                         | 15626                  | 124.24                    | 48314                     | 357.88                       | 188.06                         | 3.52                   |

|                          |                           |                          |                               |                              |                                |                           |
|--------------------------|---------------------------|--------------------------|-------------------------------|------------------------------|--------------------------------|---------------------------|
|                          | (12391 to 19290)          | (98.96 to 152.51)        | (39017 to 58508)              | (289.22 to 429.53)           | (154.58 to 222.87)             | (3.2 to 3.84)             |
| Burkina Faso             | 44<br>(35 to 56)          | 0.89<br>(0.7 to 1.13)    | 154<br>(119 to 196)           | 1.39<br>(1.08 to 1.74)       | 56.08<br>(40.34 to 73.85)      | 1.56<br>(1.44 to 1.68)    |
| Burundi                  | 21<br>(17 to 27)          | 0.83<br>(0.67 to 1.03)   | 41<br>(31 to 53)              | 0.78<br>(0.61 to 0.98)       | -6.59<br>(-17.33 to 3.67)      | -0.26<br>(-0.32 to -0.21) |
| Cabo Verde               | 4<br>(3 to 5)             | 1.74<br>(1.36 to 2.13)   | 16<br>(13 to 20)              | 3.42<br>(2.71 to 4.24)       | 97.17<br>(75.91 to 124.14)     | 2.31<br>(2.16 to 2.46)    |
| Cambodia                 | 17<br>(12 to 23)          | 0.37<br>(0.28 to 0.5)    | 137<br>(100 to 188)           | 1.15<br>(0.85 to 1.53)       | 207.91<br>(162.2 to 265.2)     | 3.91<br>(3.78 to 4.04)    |
| Cameroon                 | 111<br>(84 to 141)        | 2.13<br>(1.64 to 2.72)   | 451<br>(344 to 577)           | 3.05<br>(2.37 to 3.86)       | 43.12<br>(27.03 to 62.74)      | 1.14<br>(0.8 to 1.48)     |
| Canada                   | 1909<br>(1506 to 2399)    | 5.86<br>(4.64 to 7.34)   | 67765<br>(56040 to 80666)     | 100.8<br>(83.69 to 119.91)   | 1620.24<br>(1304.74 to 1985.2) | 10.3<br>(9.96 to 10.64)   |
| Central African Republic | 10<br>(7 to 12)           | 0.76<br>(0.6 to 0.94)    | 19<br>(15 to 24)              | 0.82<br>(0.65 to 1.01)       | 7.36<br>(-0.62 to 16.42)       | 0.26<br>(0.21 to 0.31)    |
| Chad                     | 24<br>(19 to 31)          | 0.78<br>(0.61 to 0.99)   | 70<br>(54 to 90)              | 0.99<br>(0.78 to 1.26)       | 26.78<br>(14.87 to 39.22)      | 0.8<br>(0.58 to 1.02)     |
| Chile                    | 1464<br>(1209 to 1765)    | 14.25<br>(11.79 to 17.1) | 39521<br>(32889 to 47405)     | 166.28<br>(138.23 to 198.59) | 1066.52<br>(906.49 to 1261.98) | 8.86<br>(8.8 to 8.93)     |
| China                    | 17791<br>(13302 to 23691) | 2.12<br>(1.58 to 2.76)   | 867917<br>(687948 to 1064921) | 42.75<br>(34.03 to 52.12)    | 1920.39<br>(1543.48 to 2357.5) | 11.07<br>(10.55 to 11.58) |
| Colombia                 | 1305<br>(1010 to 1603)    | 7.02<br>(5.43 to 8.66)   | 14539<br>(11904 to 17576)     | 27.56<br>(22.58 to 33.42)    | 292.44<br>(228.03 to 380.92)   | 4.73<br>(4.62 to 4.85)    |
| Comoros                  | 3<br>(2 to 4)             | 1.3<br>(1.02 to 1.61)    | 8<br>(6 to 10)                | 1.47<br>(1.14 to 1.85)       | 13.17<br>(1.17 to 26.46)       | 0.41<br>(0.35 to 0.48)    |
| Congo                    | 16<br>(13 to 20)          | 1.42<br>(1.13 to 1.77)   | 49<br>(38 to 63)              | 1.77<br>(1.37 to 2.22)       | 24.58<br>(12.51 to 37.7)       | 0.78<br>(0.72 to 0.83)    |
| Cook Islands             | 1<br>(1 to 2)             | 10.9<br>(8.57 to 13.69)  | 30<br>(23 to 37)              | 118.44<br>(91.5 to 146.01)   | 986.63<br>(791.49 to 1233.8)   | 7.97<br>(7.28 to 8.66)    |
| Costa Rica               | 193                       | 10.84                    | 2542                          | 48.79                        | 350.15                         | 5.12                      |

|                                       |                         |                           |                              |                              |                                 |                           |
|---------------------------------------|-------------------------|---------------------------|------------------------------|------------------------------|---------------------------------|---------------------------|
|                                       | (160 to 233)            | (8.98 to 13.04)           | (2115 to 3037)               | (40.59 to 58.17)             | (286.14 to 426.13)              | (4.96 to 5.29)            |
| Croatia                               | 4421<br>(3570 to 5316)  | 68.76<br>(55.68 to 82.56) | 63554<br>(54339 to 73922)    | 761.43<br>(654.39 to 881.08) | 1007.39<br>(872.45 to 1174.88)  | 8.78<br>(8.55 to 9)       |
| Cuba                                  | 774<br>(638 to 929)     | 7.47<br>(6.16 to 8.98)    | 8982<br>(7468 to 10722)      | 49.03<br>(40.91 to 58.48)    | 556.26<br>(459.41 to 662.92)    | 6.69<br>(6.47 to 6.91)    |
| Cyprus                                | 42<br>(33 to 53)        | 4.93<br>(3.85 to 6.17)    | 2657<br>(2136 to 3279)       | 131.73<br>(106.46 to 162.28) | 2574.23<br>(2097.93 to 3186.27) | 13.41<br>(11.68 to 15.17) |
| Czechia                               | 8928<br>(7022 to 11254) | 65.24<br>(51.59 to 81.37) | 135356<br>(112016 to 163024) | 676.09<br>(559.92 to 802)    | 936.35<br>(761.57 to 1154.17)   | 8.26<br>(7.75 to 8.77)    |
| Cote D'Ivoire                         | 75<br>(57 to 96)        | 1.37<br>(1.06 to 1.71)    | 243<br>(188 to 309)          | 1.72<br>(1.35 to 2.16)       | 26.26<br>(12.5 to 41.56)        | 0.65<br>(0.5 to 0.8)      |
| Democratic People's Republic of Korea | 144<br>(106 to 193)     | 0.91<br>(0.69 to 1.19)    | 1190<br>(916 to 1531)        | 3.66<br>(2.84 to 4.66)       | 303.76<br>(227.44 to 397.89)    | 4.68<br>(4.42 to 4.94)    |
| Democratic Republic of the Congo      | 168<br>(130 to 217)     | 0.97<br>(0.77 to 1.24)    | 445<br>(342 to 576)          | 1.12<br>(0.88 to 1.41)       | 15.62<br>(5.39 to 26.37)        | 0.52<br>(0.49 to 0.55)    |
| Denmark                               | 395<br>(304 to 511)     | 4.83<br>(3.71 to 6.18)    | 16873<br>(13726 to 20994)    | 142.9<br>(116.33 to 175.93)  | 2859.7<br>(2329.24 to 3473.71)  | 12.82<br>(9.8 to 15.91)   |
| Djibouti                              | 2<br>(2 to 3)           | 1.22<br>(0.97 to 1.52)    | 11<br>(8 to 14)              | 1.55<br>(1.22 to 1.94)       | 27.33<br>(15.34 to 42.52)       | 0.86<br>(0.8 to 0.91)     |
| Dominica                              | 5<br>(4 to 6)           | 7.06<br>(5.81 to 8.49)    | 33<br>(27 to 40)             | 37.31<br>(30.66 to 44.91)    | 428.72<br>(354.87 to 522.82)    | 5.85<br>(5.66 to 6.03)    |
| Dominican Republic                    | 137<br>(110 to 166)     | 3.35<br>(2.69 to 4.14)    | 2206<br>(1824 to 2650)       | 23.21<br>(19.2 to 27.72)     | 592.05<br>(489.82 to 717.39)    | 6.72<br>(6.4 to 7.04)     |
| Ecuador                               | 366<br>(292 to 454)     | 6.48<br>(5.17 to 8)       | 20348<br>(17505 to 23404)    | 132.9<br>(114.58 to 153.07)  | 1951.96<br>(1622.32 to 2364.32) | 10.73<br>(9.59 to 11.89)  |
| Egypt                                 | 2376<br>(1758 to 3087)  | 7.14<br>(5.3 to 9.32)     | 9706<br>(7369 to 12610)      | 13.43<br>(10.24 to 17.4)     | 88.04<br>(67.41 to 114.55)      | 2.68<br>(1.46 to 3.91)    |
| El Salvador                           | 91<br>(71 to 114)       | 2.98<br>(2.31 to 3.76)    | 843<br>(651 to 1101)         | 14.48<br>(11.13 to 18.99)    | 385.96<br>(301.83 to 507.68)    | 5.78<br>(5.55 to 6.01)    |
| Equatorial Guinea                     | 2                       | 0.84                      | 21                           | 4.01                         | 379.58                          | 5.95                      |

|           |                        |                           |                              |                              |                                 |                           |
|-----------|------------------------|---------------------------|------------------------------|------------------------------|---------------------------------|---------------------------|
|           | (1 to 2)               | (0.66 to 1.06)            | (16 to 27)                   | (3.01 to 5.09)               | (308.17 to 464.01)              | (5.49 to 6.42)            |
| Eritrea   | 9<br>(7 to 11)         | 0.75<br>(0.6 to 0.91)     | 27<br>(20 to 34)             | 0.86<br>(0.68 to 1.07)       | 15.16<br>(3.42 to 27.19)        | 0.48<br>(0.42 to 0.54)    |
| Estonia   | 1052<br>(854 to 1274)  | 51.27<br>(41.94 to 61.85) | 18715<br>(14075 to 23512)    | 759.94<br>(578.58 to 943.34) | 1382.22<br>(1126.44 to 1701.79) | 9.75<br>(9.11 to 10.39)   |
| Eswatini  | 11<br>(8 to 16)        | 3.66<br>(2.59 to 5.11)    | 66<br>(45 to 89)             | 10.39<br>(7.14 to 13.98)     | 183.83<br>(128.16 to 282.55)    | 3.96<br>(2.83 to 5.1)     |
| Ethiopia  | 156<br>(118 to 203)    | 0.68<br>(0.52 to 0.86)    | 512<br>(387 to 657)          | 1.05<br>(0.81 to 1.35)       | 55.3<br>(43.3 to 69.95)         | 1.62<br>(1.49 to 1.74)    |
| Fiji      | 12<br>(10 to 16)       | 3.96<br>(3.09 to 5.19)    | 158<br>(124 to 199)          | 22.15<br>(17.46 to 27.72)    | 459.95<br>(353.4 to 571.72)     | 5.72<br>(5.13 to 6.31)    |
| Finland   | 3009<br>(2471 to 3645) | 40.11<br>(33.2 to 48.45)  | 53982<br>(40850 to 67092)    | 432.08<br>(330.68 to 536.75) | 977.36<br>(743.83 to 1281.25)   | 9.1<br>(8.56 to 9.64)     |
| France    | 4797<br>(3789 to 6019) | 5.8<br>(4.6 to 7.32)      | 109065<br>(86214 to 138503)  | 79.49<br>(63.32 to 99.16)    | 1270.52<br>(1026.92 to 1564.48) | 9.85<br>(8.8 to 10.91)    |
| Gabon     | 11<br>(9 to 14)        | 1.9<br>(1.49 to 2.38)     | 112<br>(84 to 147)           | 10.01<br>(7.57 to 12.9)      | 427.46<br>(339.19 to 539.01)    | 5.97<br>(5.41 to 6.53)    |
| Gambia    | 5<br>(4 to 7)          | 1.21<br>(0.96 to 1.54)    | 18<br>(14 to 23)             | 1.57<br>(1.23 to 1.96)       | 29.83<br>(15.94 to 45.73)       | 0.82<br>(0.73 to 0.91)    |
| Georgia   | 1122<br>(877 to 1374)  | 17.93<br>(14.11 to 21.82) | 5384<br>(4501 to 6432)       | 92.12<br>(76.88 to 110.29)   | 413.8<br>(343.38 to 512.41)     | 6<br>(5.51 to 6.48)       |
| Germany   | 7099<br>(5581 to 8885) | 5.71<br>(4.5 to 7.16)     | 287039<br>(235176 to 348617) | 147.9<br>(121.44 to 179.61)  | 2492.23<br>(2025.32 to 3028.8)  | 13.43<br>(11.67 to 15.21) |
| Ghana     | 73<br>(55 to 95)       | 0.95<br>(0.73 to 1.22)    | 366<br>(282 to 463)          | 1.89<br>(1.47 to 2.33)       | 98.99<br>(76.56 to 129.32)      | 2.35<br>(2.23 to 2.47)    |
| Greece    | 1002<br>(779 to 1296)  | 6.5<br>(5.1 to 8.34)      | 30220<br>(24352 to 37184)    | 126.19<br>(103.74 to 154.94) | 1840.26<br>(1476.99 to 2285.57) | 11.11<br>(9.47 to 12.79)  |
| Greenland | 1<br>(1 to 2)          | 3.79<br>(3.02 to 4.71)    | 30<br>(24 to 36)             | 45.34<br>(37.49 to 54.11)    | 1096.89<br>(879.69 to 1328.23)  | 8.63<br>(8.27 to 8.99)    |
| Grenada   | 3                      | 4.7                       | 26                           | 22.06                        | 369.06                          | 5.08                      |

|                            |                           |                              |                              |                               |                                 |                           |
|----------------------------|---------------------------|------------------------------|------------------------------|-------------------------------|---------------------------------|---------------------------|
|                            | (2 to 4)                  | (3.45 to 5.82)               | (20 to 32)                   | (17.49 to 27.16)              | (277.75 to 508.36)              | (4.66 to 5.51)            |
| Guam                       | 18<br>(14 to 22)          | 26.5<br>(21.68 to 32.57)     | 360<br>(282 to 446)          | 189.76<br>(149.17 to 234.59)  | 616.09<br>(486.01 to 767.87)    | 7.08<br>(6.51 to 7.64)    |
| Guatemala                  | 80<br>(61 to 103)         | 1.96<br>(1.49 to 2.5)        | 761<br>(589 to 938)          | 6.42<br>(5.02 to 7.93)        | 227.99<br>(183.45 to 285.27)    | 4.21<br>(4.15 to 4.28)    |
| Guinea                     | 31<br>(24 to 41)          | 0.87<br>(0.68 to 1.12)       | 81<br>(63 to 103)            | 1.25<br>(0.99 to 1.57)        | 43.28<br>(27.55 to 61.22)       | 1.22<br>(1.09 to 1.35)    |
| Guinea-Bissau              | 5<br>(4 to 6)             | 1.04<br>(0.8 to 1.31)        | 11<br>(9 to 14)              | 1.16<br>(0.92 to 1.45)        | 11.84<br>(0.82 to 26.71)        | 0.29<br>(0.07 to 0.51)    |
| Guyana                     | 22<br>(17 to 27)          | 5.08<br>(4.06 to 6.25)       | 195<br>(156 to 238)          | 29.2<br>(23.48 to 35.73)      | 474.63<br>(378.27 to 608.82)    | 6.18<br>(5.89 to 6.48)    |
| Haiti                      | 89<br>(69 to 109)         | 2.51<br>(1.95 to 3.08)       | 552<br>(418 to 701)          | 7.17<br>(5.36 to 9.18)        | 185.61<br>(134.07 to 235.36)    | 3.57<br>(3.34 to 3.79)    |
| Honduras                   | 60<br>(47 to 75)          | 2.73<br>(2.14 to 3.4)        | 570<br>(459 to 697)          | 8.74<br>(7.08 to 10.67)       | 219.49<br>(179.58 to 268.24)    | 3.98<br>(3.83 to 4.14)    |
| Hungary                    | 27752<br>(23433 to 32723) | 186.85<br>(157.65 to 219.63) | 184447<br>(159114 to 218515) | 997.07<br>(861.74 to 1167.68) | 433.61<br>(368.27 to 512.56)    | 5.86<br>(5.64 to 6.09)    |
| Iceland                    | 18<br>(14 to 23)          | 6.38<br>(5.01 to 8.12)       | 861<br>(704 to 1044)         | 155.92<br>(128.08 to 189.36)  | 2345.02<br>(1906.73 to 2907.6)  | 12.51<br>(10.84 to 14.21) |
| India                      | 6162<br>(4676 to 7873)    | 1.21<br>(0.93 to 1.51)       | 23315<br>(18286 to 29292)    | 1.94<br>(1.52 to 2.42)        | 60.28<br>(53.5 to 67.71)        | 1.67<br>(1.64 to 1.7)     |
| Indonesia                  | 558<br>(405 to 748)       | 0.55<br>(0.41 to 0.73)       | 6015<br>(4543 to 7787)       | 2.72<br>(2.09 to 3.5)         | 390.15<br>(331.77 to 457.71)    | 5.58<br>(5.46 to 5.7)     |
| Iran (Islamic Republic of) | 1124<br>(872 to 1428)     | 3.54<br>(2.74 to 4.47)       | 3464<br>(2697 to 4337)       | 4.18<br>(3.26 to 5.23)        | 18.05<br>(10.59 to 26.31)       | 0.48<br>(0.21 to 0.74)    |
| Iraq                       | 684<br>(508 to 896)       | 8.13<br>(6.06 to 10.68)      | 1492<br>(1114 to 1949)       | 5.67<br>(4.3 to 7.39)         | -30.26<br>(-39.27 to -21.2)     | -1.37<br>(-2.16 to -0.56) |
| Ireland                    | 263<br>(204 to 340)       | 6.3<br>(4.89 to 8.06)        | 14640<br>(11042 to 17825)    | 192.79<br>(145.96 to 234.79)  | 2960.65<br>(2222.19 to 3809.19) | 13.27<br>(11.8 to 14.75)  |
| Israel                     | 191                       | 3.87                         | 4366                         | 37.58                         | 871.22                          | 8.63                      |

|                                  |                              |                              |                                 |                              |                               |                        |
|----------------------------------|------------------------------|------------------------------|---------------------------------|------------------------------|-------------------------------|------------------------|
|                                  | (145 to 246)                 | (2.95 to 4.91)               | (3423 to 5539)                  | (29.51 to 47.6)              | (677.4 to 1103.09)            | (7.79 to 9.47)         |
| Italy                            | 74111<br>(60295 to 89699)    | 84.07<br>(68.6 to 101.04)    | 560971<br>(474688 to 662132)    | 408.26<br>(347.04 to 476.32) | 385.61<br>(346.8 to 434.6)    | 5.56<br>(4.32 to 6.81) |
| Jamaica                          | 68<br>(54 to 84)             | 3.89<br>(3.07 to 4.86)       | 604<br>(466 to 803)             | 20.35<br>(15.71 to 27.14)    | 423<br>(329.23 to 553.76)     | 5.66<br>(5.2 to 6.11)  |
| Japan                            | 439043<br>(357529 to 530647) | 261.58<br>(214.61 to 314.48) | 1411874<br>(1186418 to 1700725) | 435.47<br>(369.13 to 514.16) | 66.48<br>(55.42 to 77.26)     | 1.77<br>(1.68 to 1.85) |
| Jordan                           | 107<br>(79 to 145)           | 6.34<br>(4.74 to 8.73)       | 1510<br>(1150 to 1917)          | 18.74<br>(14.28 to 23.93)    | 195.41<br>(140.1 to 261.76)   | 3.93<br>(3.65 to 4.2)  |
| Kazakhstan                       | 1535<br>(1176 to 1952)       | 11.96<br>(9.2 to 15.25)      | 17880<br>(14238 to 21613)       | 97.94<br>(77.96 to 117.06)   | 718.91<br>(588.22 to 889.22)  | 7.43<br>(7.1 to 7.75)  |
| Kenya                            | 120<br>(92 to 153)           | 1.32<br>(1.03 to 1.7)        | 709<br>(537 to 898)             | 2.77<br>(2.12 to 3.52)       | 108.94<br>(86.94 to 134.8)    | 2.64<br>(2.5 to 2.78)  |
| Kiribati                         | 1<br>(1 to 1)                | 2.08<br>(1.64 to 2.71)       | 4<br>(3 to 5)                   | 6.5<br>(4.98 to 8.33)        | 212.75<br>(166.94 to 267.1)   | 3.67<br>(3.03 to 4.3)  |
| Kuwait                           | 577<br>(447 to 729)          | 59.49<br>(46.5 to 75.12)     | 3193<br>(2488 to 4024)          | 85.34<br>(66.96 to 106.72)   | 43.46<br>(31.07 to 58.32)     | 1.13<br>(0.07 to 2.2)  |
| Kyrgyzstan                       | 116<br>(88 to 151)           | 3.75<br>(2.85 to 4.83)       | 604<br>(471 to 738)             | 12.13<br>(9.57 to 14.79)     | 223.47<br>(174.04 to 291.71)  | 4.12<br>(3.9 to 4.34)  |
| Lao People's Democratic Republic | 9<br>(6 to 11)               | 0.41<br>(0.31 to 0.53)       | 48<br>(35 to 66)                | 1.11<br>(0.82 to 1.49)       | 171.56<br>(133.35 to 211.94)  | 3.43<br>(3.29 to 3.57) |
| Latvia                           | 1890<br>(1567 to 2295)       | 53.05<br>(44.04 to 63.93)    | 19331<br>(15857 to 23481)       | 526.67<br>(435.44 to 631.71) | 892.84<br>(775.57 to 1047.38) | 8.63<br>(8.22 to 9.04) |
| Lebanon                          | 156<br>(113 to 221)          | 6.17<br>(4.49 to 8.69)       | 588<br>(437 to 783)             | 11.26<br>(8.34 to 15.04)     | 82.56<br>(58.11 to 114.82)    | 2.48<br>(2.07 to 2.89) |
| Lesotho                          | 13<br>(10 to 17)             | 1.32<br>(1.06 to 1.65)       | 45<br>(35 to 56)                | 3.28<br>(2.6 to 4.08)        | 147.68<br>(115.45 to 189.28)  | 3.09<br>(2.9 to 3.29)  |
| Liberia                          | 14<br>(11 to 18)             | 1.16<br>(0.88 to 1.49)       | 58<br>(43 to 76)                | 2.18<br>(1.65 to 2.81)       | 87.45<br>(67.51 to 115.99)    | 2.32<br>(2.19 to 2.45) |

|                                  |                        |                           |                           |                              |                                 |                           |
|----------------------------------|------------------------|---------------------------|---------------------------|------------------------------|---------------------------------|---------------------------|
| Libya                            | 229<br>(173 to 291)    | 10.87<br>(8.23 to 13.9)   | 646<br>(489 to 828)       | 11.24<br>(8.49 to 14.42)     | 3.39<br>(-7.52 to 15.46)        | -0.01<br>(-0.33 to 0.32)  |
| Lithuania                        | 1728<br>(1379 to 2093) | 38.33<br>(30.69 to 46.11) | 20324<br>(16803 to 24468) | 380.23<br>(316.79 to 452.87) | 892.08<br>(756.03 to 1064.18)   | 8.28<br>(8.06 to 8.5)     |
| Luxembourg                       | 85<br>(67 to 110)      | 15.33<br>(12.1 to 19.62)  | 2621<br>(2133 to 3210)    | 264.1<br>(215.26 to 323.76)  | 1623.26<br>(1387.11 to 1929.31) | 10.49<br>(9.1 to 11.9)    |
| Madagascar                       | 76<br>(62 to 94)       | 1.3<br>(1.05 to 1.57)     | 188<br>(149 to 235)       | 1.43<br>(1.15 to 1.75)       | 10.12<br>(0.71 to 19.64)        | 0.25<br>(0.16 to 0.33)    |
| Malawi                           | 35<br>(26 to 45)       | 0.85<br>(0.65 to 1.08)    | 95<br>(71 to 123)         | 1.19<br>(0.91 to 1.53)       | 40.47<br>(28.05 to 56.29)       | 1.13<br>(0.92 to 1.34)    |
| Malaysia                         | 131<br>(96 to 168)     | 1.48<br>(1.11 to 1.91)    | 2872<br>(2240 to 3646)    | 10.91<br>(8.63 to 13.67)     | 635.5<br>(509.49 to 803.04)     | 7.4<br>(6.93 to 7.87)     |
| Maldives                         | 1<br>(1 to 1)          | 0.9<br>(0.68 to 1.16)     | 19<br>(15 to 25)          | 6.77<br>(5.23 to 8.68)       | 654.19<br>(519.47 to 809.67)    | 6.8<br>(6.27 to 7.34)     |
| Mali                             | 41<br>(32 to 53)       | 0.87<br>(0.68 to 1.11)    | 115<br>(89 to 146)        | 1.11<br>(0.86 to 1.39)       | 27.66<br>(13.45 to 43.02)       | 0.76<br>(0.62 to 0.9)     |
| Malta                            | 15<br>(11 to 19)       | 3.48<br>(2.63 to 4.49)    | 958<br>(806 to 1156)      | 99.79<br>(83.46 to 119.84)   | 2770.62<br>(2183.09 to 3508.7)  | 12.91<br>(11.26 to 14.58) |
| Marshall Islands                 | 0<br>(0 to 1)          | 2.51<br>(1.99 to 3.24)    | 3<br>(2 to 3)             | 8.03<br>(6.34 to 10.14)      | 219.37<br>(178.34 to 272.44)    | 3.52<br>(2.86 to 4.18)    |
| Mauritania                       | 21<br>(16 to 26)       | 1.86<br>(1.45 to 2.31)    | 80<br>(61 to 101)         | 3.33<br>(2.55 to 4.2)        | 78.98<br>(53.68 to 108.49)      | 2.08<br>(1.91 to 2.25)    |
| Mauritius                        | 12<br>(9 to 16)        | 1.68<br>(1.28 to 2.16)    | 252<br>(195 to 326)       | 14.25<br>(11.15 to 18.11)    | 748.69<br>(593.11 to 960.55)    | 7.21<br>(6.73 to 7.69)    |
| Mexico                           | 4473<br>(3540 to 5478) | 9.96<br>(7.87 to 12.2)    | 50230<br>(40976 to 60266) | 41.39<br>(33.68 to 49.4)     | 315.59<br>(275.5 to 364.69)     | 5.51<br>(3.85 to 7.2)     |
| Micronesia (Federated States of) | 2<br>(2 to 3)          | 5.13<br>(3.93 to 6.61)    | 14<br>(11 to 18)          | 22.73<br>(18.04 to 28.83)    | 343.06<br>(267.26 to 432.06)    | 4.49<br>(3.7 to 5.28)     |
| Monaco                           | 9<br>(7 to 12)         | 12.96<br>(10.11 to 17.05) | 266<br>(220 to 329)       | 291.41<br>(242.55 to 359.55) | 2148.61<br>(1738.83 to 2682.69) | 11.62<br>(10.72 to 12.53) |

|                 |                        |                             |                           |                              |                              |                        |
|-----------------|------------------------|-----------------------------|---------------------------|------------------------------|------------------------------|------------------------|
| Mongolia        | 30<br>(23 to 39)       | 2.73<br>(2.08 to 3.54)      | 312<br>(246 to 388)       | 11.74<br>(9.38 to 14.38)     | 330<br>(262.31 to 423.98)    | 5.06<br>(4.69 to 5.43) |
| Montenegro      | 678<br>(535 to 836)    | 108.71<br>(86.03 to 134.34) | 4187<br>(3402 to 5087)    | 433.64<br>(352.66 to 524.66) | 298.89<br>(251.37 to 352.96) | 5.01<br>(4.82 to 5.2)  |
| Morocco         | 282<br>(215 to 360)    | 1.83<br>(1.39 to 2.32)      | 1125<br>(869 to 1413)     | 3.24<br>(2.5 to 4.04)        | 77.15<br>(56.98 to 99.87)    | 1.99<br>(1.91 to 2.07) |
| Mozambique      | 47<br>(36 to 60)       | 0.73<br>(0.57 to 0.92)      | 148<br>(116 to 187)       | 1.22<br>(0.96 to 1.51)       | 67.59<br>(52.03 to 86)       | 1.86<br>(1.7 to 2.02)  |
| Myanmar         | 95<br>(70 to 128)      | 0.4<br>(0.3 to 0.54)        | 554<br>(399 to 756)       | 1.2<br>(0.87 to 1.6)         | 195.18<br>(153.14 to 246.82) | 3.73<br>(3.65 to 3.81) |
| Namibia         | 12<br>(9 to 14)        | 1.56<br>(1.25 to 1.92)      | 43<br>(34 to 53)          | 2.9<br>(2.34 to 3.54)        | 86.29<br>(70.94 to 106)      | 2.2<br>(2.09 to 2.31)  |
| Nauru           | 0<br>(0 to 0)          | 5.56<br>(4.36 to 7.24)      | 1<br>(0 to 1)             | 17.2<br>(13.58 to 21.33)     | 209.13<br>(166.34 to 262.44) | 3.22<br>(2.41 to 4.04) |
| Nepal           | 98<br>(74 to 127)      | 0.94<br>(0.73 to 1.21)      | 497<br>(382 to 626)       | 2.12<br>(1.65 to 2.67)       | 126<br>(101.25 to 151.98)    | 2.89<br>(2.75 to 3.04) |
| Netherlands     | 731<br>(572 to 931)    | 3.66<br>(2.86 to 4.62)      | 10494<br>(8327 to 13411)  | 30.87<br>(24.52 to 39.18)    | 743.57<br>(603.22 to 931.99) | 7.71<br>(7.13 to 8.29) |
| New Zealand     | 3312<br>(2685 to 4130) | 84.34<br>(68.75 to 104.19)  | 32328<br>(27212 to 38143) | 405.99<br>(342.78 to 477.05) | 381.37<br>(333.24 to 438.39) | 5.99<br>(5.36 to 6.62) |
| Nicaragua       | 54<br>(42 to 67)       | 3.12<br>(2.46 to 3.89)      | 512<br>(403 to 632)       | 10.36<br>(8.19 to 12.7)      | 232.4<br>(188.47 to 289.12)  | 4.27<br>(4.14 to 4.4)  |
| Niger           | 30<br>(23 to 39)       | 0.85<br>(0.65 to 1.08)      | 96<br>(73 to 125)         | 0.98<br>(0.75 to 1.25)       | 15.87<br>(4.55 to 29.75)     | 0.46<br>(0.4 to 0.51)  |
| Nigeria         | 714<br>(545 to 908)    | 1.4<br>(1.08 to 1.76)       | 1762<br>(1345 to 2233)    | 1.6<br>(1.24 to 2.01)        | 14.34<br>(9.26 to 19.47)     | 0.37<br>(0.18 to 0.57) |
| Niue            | 0<br>(0 to 0)          | 5.82<br>(4.59 to 7.26)      | 1<br>(1 to 1)             | 49.02<br>(38.72 to 60.88)    | 742.93<br>(598.26 to 919.75) | 7.03<br>(6.48 to 7.59) |
| North Macedonia | 876<br>(693 to 1084)   | 46.36<br>(37.01 to 56.91)   | 9898<br>(8139 to 11957)   | 307.54<br>(253.65 to 370.57) | 563.41<br>(460.12 to 708.83) | 6.92<br>(6.63 to 7.21) |

|                          |                           |                             |                              |                              |                                |                           |
|--------------------------|---------------------------|-----------------------------|------------------------------|------------------------------|--------------------------------|---------------------------|
| Northern Mariana Islands | 5<br>(4 to 6)             | 34.32<br>(27.14 to 43.3)    | 65<br>(49 to 82)             | 128.64<br>(102.16 to 159.79) | 274.79<br>(210.07 to 348.57)   | 3.51<br>(2.38 to 4.65)    |
| Norway                   | 753<br>(598 to 963)       | 11.08<br>(8.81 to 14.1)     | 5517<br>(4329 to 7066)       | 57.49<br>(45.28 to 73.06)    | 418.88<br>(355.26 to 499.74)   | 5.99<br>(5.31 to 6.68)    |
| Oman                     | 32<br>(25 to 41)          | 3.69<br>(2.9 to 4.55)       | 320<br>(237 to 413)          | 11.96<br>(9.11 to 15.24)     | 224.28<br>(170.69 to 287.73)   | 4.01<br>(3.67 to 4.36)    |
| Pakistan                 | 1502<br>(1181 to 1912)    | 2.53<br>(1.98 to 3.23)      | 4106<br>(3216 to 5110)       | 3.41<br>(2.69 to 4.25)       | 34.7<br>(26.4 to 43.55)        | 0.98<br>(0.74 to 1.23)    |
| Palau                    | 1<br>(0 to 1)             | 6.56<br>(4.98 to 8.42)      | 12<br>(9 to 14)              | 56.57<br>(44.48 to 71.27)    | 762.94<br>(590.56 to 971.91)   | 7.23<br>(6.59 to 7.88)    |
| Palestine                | 30<br>(22 to 40)          | 3.15<br>(2.31 to 4.11)      | 96<br>(70 to 128)            | 3.29<br>(2.43 to 4.3)        | 4.22<br>(-15.29 to 21.96)      | 0.09<br>(-0.96 to 1.16)   |
| Panama                   | 85<br>(67 to 105)         | 5.44<br>(4.29 to 6.82)      | 635<br>(517 to 772)          | 15.29<br>(12.49 to 18.55)    | 180.78<br>(138.15 to 230.99)   | 3.31<br>(3.03 to 3.59)    |
| Papua New Guinea         | 35<br>(28 to 45)          | 2.03<br>(1.59 to 2.61)      | 241<br>(186 to 300)          | 5.13<br>(3.99 to 6.35)       | 153.11<br>(123.16 to 189.15)   | 2.8<br>(2.32 to 3.28)     |
| Paraguay                 | 129<br>(105 to 157)       | 5.4<br>(4.4 to 6.57)        | 1448<br>(1203 to 1725)       | 25.43<br>(21.13 to 30.44)    | 371.11<br>(311.01 to 446.58)   | 5.56<br>(5.41 to 5.71)    |
| Peru                     | 377<br>(297 to 478)       | 2.91<br>(2.3 to 3.64)       | 11562<br>(9339 to 14013)     | 35.9<br>(29.07 to 43.6)      | 1133.55<br>(921.75 to 1393.78) | 9.13<br>(8.77 to 9.48)    |
| Philippines              | 187<br>(135 to 256)       | 0.6<br>(0.44 to 0.82)       | 1364<br>(997 to 1821)        | 1.73<br>(1.28 to 2.31)       | 186.99<br>(157.18 to 222.53)   | 3.67<br>(3.57 to 3.78)    |
| Poland                   | 49436<br>(39196 to 59539) | 113.21<br>(89.83 to 135.96) | 258294<br>(209260 to 305720) | 382.71<br>(310.52 to 454.22) | 238.06<br>(215.55 to 265.1)    | 4.4<br>(3.92 to 4.89)     |
| Portugal                 | 303<br>(228 to 402)       | 2.15<br>(1.63 to 2.86)      | 11252<br>(9003 to 14287)     | 46.47<br>(37.66 to 57.77)    | 2059.47<br>(1626.8 to 2611.12) | 11.77<br>(10.93 to 12.62) |
| Puerto Rico              | 1944<br>(1573 to 2414)    | 53.47<br>(43.26 to 66.24)   | 28773<br>(22813 to 35815)    | 457.61<br>(362.96 to 575.53) | 755.77<br>(599.99 to 940.83)   | 7.92<br>(7.17 to 8.68)    |
| Qatar                    | 283<br>(214 to 362)       | 108.48<br>(83.11 to 138.8)  | 2668<br>(2055 to 3339)       | 137.22<br>(105.59 to 171.6)  | 26.49<br>(12.78 to 41.67)      | 1.6<br>(0.32 to 2.89)     |

|                                  |                           |                             |                                |                                |                                 |                           |
|----------------------------------|---------------------------|-----------------------------|--------------------------------|--------------------------------|---------------------------------|---------------------------|
| Republic of Korea                | 28188<br>(22924 to 34053) | 92.66<br>(75.6 to 111.97)   | 268834<br>(226640 to 317268)   | 310.27<br>(261.14 to 364.94)   | 234.86<br>(186.12 to 295.02)    | 4.33<br>(4.2 to 4.45)     |
| Republic of Moldova              | 704<br>(567 to 852)       | 15.88<br>(12.78 to 19.14)   | 15714<br>(12437 to 19128)      | 274.15<br>(219.12 to 333.46)   | 1626.14<br>(1354.47 to 1906.05) | 10.76<br>(10.15 to 11.38) |
| Romania                          | 32933<br>(26572 to 40249) | 117.25<br>(94.72 to 142.48) | 369313<br>(300496 to 454223)   | 1044.49<br>(855.59 to 1271.28) | 790.81<br>(643.87 to 959.57)    | 8.36<br>(7.12 to 9.61)    |
| Russian Federation               | 78538<br>(62246 to 97562) | 42.95<br>(34.28 to 53.09)   | 1049884<br>(839793 to 1270534) | 456.35<br>(365.58 to 553.15)   | 962.41<br>(882.47 to 1050.54)   | 8.64<br>(8.21 to 9.08)    |
| Rwanda                           | 32<br>(25 to 39)          | 1<br>(0.8 to 1.24)          | 79<br>(60 to 101)              | 1.22<br>(0.94 to 1.53)         | 21.51<br>(8.35 to 35.51)        | 0.7<br>(0.63 to 0.77)     |
| Saint Kitts and Nevis            | 2<br>(2 to 3)             | 6.13<br>(5 to 7.47)         | 28<br>(22 to 33)               | 39.52<br>(32.26 to 47.2)       | 544.39<br>(457.33 to 644.44)    | 6.48<br>(6.32 to 6.65)    |
| Saint Lucia                      | 5<br>(4 to 6)             | 5.89<br>(4.84 to 7.13)      | 71<br>(59 to 86)               | 32.61<br>(26.88 to 39.31)      | 453.17<br>(373.43 to 557)       | 6.03<br>(5.97 to 6.1)     |
| Saint Vincent and the Grenadines | 4<br>(3 to 5)             | 4.95<br>(3.95 to 6.16)      | 42<br>(34 to 50)               | 30.25<br>(24.94 to 36.43)      | 510.85<br>(396.93 to 636.56)    | 6.44<br>(6.3 to 6.59)     |
| Samoa                            | 11<br>(9 to 13)           | 13.31<br>(10.55 to 16.77)   | 36<br>(29 to 45)               | 26.44<br>(21.08 to 33.1)       | 98.68<br>(72.93 to 132.31)      | 2.03<br>(1.14 to 2.92)    |
| San Marino                       | 2<br>(2 to 3)             | 6.38<br>(4.87 to 8.26)      | 109<br>(85 to 132)             | 169.43<br>(134.48 to 203.7)    | 2555.48<br>(2042.98 to 3187.78) | 12.62<br>(10.8 to 14.47)  |
| Sao Tome and Principe            | 1<br>(1 to 1)             | 1.48<br>(1.13 to 1.87)      | 4<br>(3 to 5)                  | 2.76<br>(2.11 to 3.4)          | 86.39<br>(66.14 to 112.24)      | 2.2<br>(2.04 to 2.35)     |
| Saudi Arabia                     | 333<br>(237 to 450)       | 4.61<br>(3.32 to 6.39)      | 7647<br>(5831 to 9605)         | 30.66<br>(23.69 to 38.07)      | 564.54<br>(426.43 to 726.36)    | 6.76<br>(6.57 to 6.95)    |
| Senegal                          | 42<br>(33 to 54)          | 1.12<br>(0.88 to 1.42)      | 120<br>(92 to 152)             | 1.34<br>(1.05 to 1.7)          | 19.52<br>(6.93 to 32.71)        | 0.61<br>(0.53 to 0.7)     |
| Serbia                           | 6606<br>(5454 to 7854)    | 57.34<br>(48.14 to 67.6)    | 78339<br>(66345 to 92903)      | 492.89<br>(417.41 to 579.51)   | 759.65<br>(628.89 to 930.8)     | 7.99<br>(7.61 to 8.37)    |
| Seychelles                       | 2<br>(1 to 2)             | 2.79<br>(2.1 to 3.6)        | 23<br>(17 to 30)               | 20.89<br>(15.47 to 27.26)      | 649.55<br>(502.33 to 850.84)    | 7.29<br>(6.17 to 8.41)    |

|                      |                        |                             |                            |                                |                                 |                           |
|----------------------|------------------------|-----------------------------|----------------------------|--------------------------------|---------------------------------|---------------------------|
| Sierra Leone         | 22<br>(17 to 28)       | 1.04<br>(0.81 to 1.31)      | 57<br>(44 to 74)           | 1.27<br>(1 to 1.6)             | 22.53<br>(10.23 to 35.13)       | 0.66<br>(0.48 to 0.85)    |
| Singapore            | 2259<br>(1849 to 2746) | 98.11<br>(80.67 to 120.32)  | 34092<br>(28074 to 40796)  | 433.97<br>(358.54 to 518.38)   | 342.34<br>(298.84 to 384.98)    | 5.32<br>(5.17 to 5.47)    |
| Slovakia             | 2434<br>(1962 to 3038) | 40.65<br>(32.66 to 50.46)   | 36995<br>(30865 to 43899)  | 410.75<br>(342.55 to 482.3)    | 910.55<br>(755.32 to 1096.75)   | 9.43<br>(8.53 to 10.33)   |
| Slovenia             | 2708<br>(2152 to 3350) | 110.19<br>(87.57 to 136.18) | 44251<br>(33263 to 56437)  | 1080.06<br>(825.88 to 1367.13) | 880.19<br>(684.88 to 1152.6)    | 8.48<br>(8.18 to 8.78)    |
| Solomon Islands      | 3<br>(2 to 4)          | 2.37<br>(1.84 to 3.1)       | 19<br>(15 to 24)           | 6.73<br>(5.28 to 8.49)         | 183.58<br>(142.41 to 231.51)    | 3.29<br>(2.92 to 3.66)    |
| Somalia              | 23<br>(17 to 29)       | 0.78<br>(0.62 to 0.98)      | 53<br>(40 to 70)           | 0.66<br>(0.52 to 0.85)         | -14.99<br>(-23.51 to -5.58)     | -0.53<br>(-0.58 to -0.48) |
| South Africa         | 2243<br>(1747 to 2788) | 10.2<br>(7.92 to 12.73)     | 56993<br>(43896 to 72883)  | 118.85<br>(91.51 to 151.35)    | 1065.04<br>(879.05 to 1286.31)  | 9.06<br>(8.66 to 9.47)    |
| South Sudan          | 30<br>(23 to 38)       | 1.14<br>(0.88 to 1.45)      | 53<br>(40 to 70)           | 1.21<br>(0.92 to 1.56)         | 6.3<br>(-4.2 to 18.78)          | 0.24<br>(-0.02 to 0.5)    |
| Spain                | 3319<br>(2599 to 4182) | 6.14<br>(4.83 to 7.7)       | 82884<br>(66764 to 102702) | 85.32<br>(69.27 to 105.43)     | 1288.85<br>(1052.65 to 1560.36) | 9.84<br>(8.72 to 10.98)   |
| Sri Lanka            | 175<br>(132 to 224)    | 1.61<br>(1.22 to 2.06)      | 1070<br>(818 to 1354)      | 4.07<br>(3.16 to 5.14)         | 152.29<br>(117.89 to 195.81)    | 3.1<br>(2.94 to 3.25)     |
| Sudan                | 137<br>(105 to 175)    | 1.31<br>(1.01 to 1.68)      | 508<br>(390 to 646)        | 2.33<br>(1.82 to 2.97)         | 78.14<br>(59.81 to 99.6)        | 2.04<br>(1.89 to 2.19)    |
| Suriname             | 13<br>(10 to 15)       | 4.6<br>(3.7 to 5.57)        | 170<br>(137 to 206)        | 27.52<br>(22.3 to 33.2)        | 498.04<br>(420.68 to 590.92)    | 6.41<br>(6.3 to 6.51)     |
| Sweden               | 5508<br>(4430 to 6984) | 35.49<br>(28.84 to 44.74)   | 60975<br>(49804 to 74278)  | 284.59<br>(234.8 to 343.78)    | 701.81<br>(617.85 to 804.45)    | 7.07<br>(6.38 to 7.75)    |
| Switzerland          | 1277<br>(1002 to 1664) | 12.01<br>(9.47 to 15.65)    | 43794<br>(36987 to 51577)  | 248.78<br>(210.62 to 294.25)   | 1971.85<br>(1629.06 to 2415.51) | 11.22<br>(10.1 to 12.37)  |
| Syrian Arab Republic | 397<br>(314 to 490)    | 6.71<br>(5.29 to 8.26)      | 760<br>(594 to 947)        | 5.57<br>(4.4 to 6.86)          | -17.02<br>(-27.59 to -5.67)     | -0.57<br>(-0.73 to -0.41) |

|                            |                           |                           |                              |                              |                                |                           |
|----------------------------|---------------------------|---------------------------|------------------------------|------------------------------|--------------------------------|---------------------------|
| Taiwan (Province of China) | 337<br>(250 to 448)       | 2.31<br>(1.75 to 2.98)    | 21911<br>(18162 to 26764)    | 55.11<br>(45.84 to 66.97)    | 2287.18<br>(1814.11 to 2898.3) | 11.45<br>(10.82 to 12.08) |
| Tajikistan                 | 71<br>(53 to 94)          | 2.4<br>(1.79 to 3.16)     | 353<br>(273 to 461)          | 5.72<br>(4.47 to 7.19)       | 138.82<br>(99.67 to 185.01)    | 3.03<br>(2.96 to 3.1)     |
| Thailand                   | 338<br>(250 to 447)       | 0.97<br>(0.74 to 1.26)    | 9793<br>(7633 to 12303)      | 9.52<br>(7.44 to 11.92)      | 879.65<br>(706.15 to 1133.02)  | 8.16<br>(8.03 to 8.29)    |
| Timor-Leste                | 1<br>(1 to 2)             | 0.42<br>(0.31 to 0.56)    | 10<br>(7 to 13)              | 1.18<br>(0.88 to 1.55)       | 178.43<br>(138.22 to 235.3)    | 3.54<br>(3.43 to 3.65)    |
| Togo                       | 18<br>(14 to 22)          | 1.13<br>(0.89 to 1.4)     | 70<br>(54 to 88)             | 1.48<br>(1.17 to 1.82)       | 31.72<br>(20.74 to 45.85)      | 0.93<br>(0.76 to 1.1)     |
| Tokelau                    | 0<br>(0 to 0)             | 2.77<br>(2.2 to 3.49)     | 0<br>(0 to 0)                | 18.42<br>(14.59 to 23.16)    | 564.71<br>(448.07 to 714.72)   | 6.45<br>(6.08 to 6.82)    |
| Tonga                      | 4<br>(3 to 5)             | 8.28<br>(6.5 to 10.65)    | 27<br>(22 to 34)             | 35.43<br>(28.24 to 44.19)    | 328.04<br>(261.78 to 408.37)   | 4.15<br>(2.99 to 5.32)    |
| Trinidad and Tobago        | 60<br>(47 to 75)          | 6.83<br>(5.36 to 8.54)    | 826<br>(656 to 1019)         | 43.89<br>(35.16 to 53.79)    | 542.82<br>(440.31 to 679.41)   | 7.07<br>(6.41 to 7.74)    |
| Tunisia                    | 226<br>(176 to 284)       | 4.04<br>(3.17 to 5.07)    | 847<br>(664 to 1071)         | 6.38<br>(5 to 8.03)          | 58.03<br>(42.25 to 77.12)      | 1.72<br>(1.54 to 1.9)     |
| Turkey                     | 1956<br>(1540 to 2409)    | 4.96<br>(3.95 to 6.04)    | 11167<br>(8897 to 13574)     | 12.3<br>(9.82 to 14.89)      | 147.97<br>(117.94 to 183.13)   | 3.19<br>(2.77 to 3.61)    |
| Turkmenistan               | 75<br>(56 to 98)          | 3.78<br>(2.85 to 4.9)     | 1859<br>(1475 to 2277)       | 44.16<br>(35.28 to 53.39)    | 1068.28<br>(842.1 to 1362.16)  | 8.8<br>(8.56 to 9.04)     |
| Tuvalu                     | 0<br>(0 to 0)             | 2.06<br>(1.61 to 2.6)     | 1<br>(1 to 1)                | 9.09<br>(7.06 to 11.4)       | 340.83<br>(276.58 to 416.85)   | 4.77<br>(4.28 to 5.26)    |
| Uganda                     | 58<br>(44 to 75)          | 0.83<br>(0.64 to 1.05)    | 166<br>(127 to 213)          | 1.06<br>(0.82 to 1.33)       | 27.94<br>(17.03 to 41.69)      | 0.77<br>(0.63 to 0.92)    |
| Ukraine                    | 34725<br>(27665 to 42099) | 49.15<br>(39.26 to 59.28) | 168866<br>(133883 to 206429) | 232.44<br>(185.06 to 282.36) | 372.91<br>(333.16 to 420.12)   | 5.63<br>(5.31 to 5.95)    |
| United Arab Emirates       | 170<br>(125 to 230)       | 18.86<br>(14.42 to 24.46) | 5738<br>(4365 to 7301)       | 69.23<br>(53.5 to 88.41)     | 267.14<br>(223.05 to 328.04)   | 4.18<br>(2.72 to 5.67)    |

|                                       |                              |                              |                                 |                              |                               |                        |
|---------------------------------------|------------------------------|------------------------------|---------------------------------|------------------------------|-------------------------------|------------------------|
| United Kingdom                        | 108479<br>(86136 to 137223)  | 118.65<br>(94.51 to 149.28)  | 431376<br>(360325 to 516765)    | 341.24<br>(287.07 to 405.19) | 187.6<br>(153.66 to 228.41)   | 3.82<br>(3.4 to 4.24)  |
| United Republic of<br>Tanzania        | 122<br>(92 to 156)           | 1.06<br>(0.81 to 1.33)       | 409<br>(311 to 524)             | 1.54<br>(1.18 to 1.95)       | 45.81<br>(31.22 to 62.55)     | 1.35<br>(1.2 to 1.49)  |
| United States of America              | 685738<br>(556401 to 838473) | 210.23<br>(171.24 to 256.04) | 1425073<br>(1243341 to 1649908) | 261.92<br>(229.32 to 299.88) | 24.58<br>(11.1 to 41.3)       | 1.77<br>(0.72 to 2.84) |
| United States Virgin<br>Islands       | 30<br>(24 to 37)             | 32.95<br>(27 to 40.62)       | 484<br>(388 to 595)             | 263.88<br>(211.63 to 324)    | 700.74<br>(581.21 to 833.25)  | 7.26<br>(6.81 to 7.72) |
| Uruguay                               | 494<br>(381 to 645)          | 12.71<br>(9.88 to 16.44)     | 7001<br>(5879 to 8386)          | 129.03<br>(108.73 to 153.35) | 914.83<br>(700.14 to 1168.81) | 8.05<br>(7.75 to 8.35) |
| Uzbekistan                            | 427<br>(319 to 557)          | 3.65<br>(2.74 to 4.73)       | 7733<br>(6102 to 9525)          | 33.6<br>(27.16 to 40.4)      | 819.39<br>(646.32 to 1044.74) | 8.08<br>(7.83 to 8.33) |
| Vanuatu                               | 2<br>(1 to 2)                | 3.01<br>(2.35 to 3.9)        | 14<br>(11 to 18)                | 8.39<br>(6.57 to 10.66)      | 178.53<br>(141.7 to 226.35)   | 3.28<br>(2.92 to 3.64) |
| Venezuela (Bolivarian<br>Republic of) | 655<br>(534 to 788)          | 6.51<br>(5.29 to 7.84)       | 6325<br>(5185 to 7603)          | 21.17<br>(17.36 to 25.42)    | 225.06<br>(185.25 to 268.49)  | 4.08<br>(3.77 to 4.4)  |
| Viet Nam                              | 257<br>(193 to 342)          | 0.63<br>(0.48 to 0.83)       | 1796<br>(1333 to 2368)          | 1.93<br>(1.44 to 2.52)       | 204.44<br>(161.9 to 259.87)   | 3.84<br>(3.73 to 3.94) |
| Yemen                                 | 75<br>(59 to 96)             | 1.27<br>(1 to 1.61)          | 268<br>(208 to 347)             | 1.67<br>(1.31 to 2.11)       | 30.75<br>(18.1 to 45.41)      | 0.94<br>(0.88 to 1)    |
| Zambia                                | 28<br>(21 to 36)             | 0.91<br>(0.7 to 1.17)        | 103<br>(78 to 133)              | 1.38<br>(1.06 to 1.76)       | 51.8<br>(36.32 to 70.3)       | 1.49<br>(1.2 to 1.78)  |
| Zimbabwe                              | 77<br>(60 to 96)             | 1.77<br>(1.39 to 2.21)       | 172<br>(138 to 210)             | 2.27<br>(1.83 to 2.77)       | 28.18<br>(16.54 to 41.04)     | 0.79<br>(0.59 to 0.98) |

AAPC, average annual percentage change; ASPR, age-standardized prevalence rate; SDI, sociodemographic index; UI, uncertainty interval; CI, confidence interval.
