# Supplementary material for: Global Burden and Improvement Gap of Non-Rheumatic Calcific Aortic Valve Disease: 1990–2019 Findings from Global Burden of Disease Study 2019
Source: MDPI journal article supplement (doi:10.3390/jcm11226733), 2022-11-14
Supplement: s1 [file s1]

Table S6. Frontier DALYs and effective difference by country or territory.

|                     | SDI   | Age standardized DALYs    | Frontier DALYs | Effective difference | Effective difference rank (Age standardized DALYs rank) |
|---------------------|-------|---------------------------|----------------|----------------------|---------------------------------------------------------|
| Afghanistan         | 0.343 | 21.27<br>(10.74 to 33.83) | 3.65           | 17.63                | 120 (127)                                               |
| Albania             | 0.681 | 11.56<br>(8.39 to 15.37)  | 2.49           | 9.07                 | 43 (35)                                                 |
| Algeria             | 0.652 | 21.12<br>(13.79 to 28.87) | 2.44           | 18.68                | 128 (126)                                               |
| American Samoa      | 0.712 | 23.53<br>(18.83 to 28.9)  | 2.49           | 21.04                | 140 (139)                                               |
| Andorra             | 0.894 | 26.72<br>(19.84 to 35.11) | 2.48           | 24.24                | 151 (151)                                               |
| Angola              | 0.47  | 19.74<br>(15.01 to 26.06) | 3.65           | 16.09                | 111 (114)                                               |
| Antigua and Barbuda | 0.743 | 17.78<br>(14.59 to 22.4)  | 2.49           | 15.29                | 100 (95)                                                |
| Argentina           | 0.708 | 57.86<br>(52.02 to 63.25) | 2.48           | 55.38                | 190 (190)                                               |
| Armenia             | 0.689 | 7.55<br>(6.3 to 8.97)     | 2.47           | 5.08                 | 29 (24)                                                 |
| Australia           | 0.839 | 41.11<br>(35.26 to 47.46) | 2.49           | 38.63                | 169 (169)                                               |
| Austria             | 0.849 | 58.84<br>(50.9 to 67.64)  | 2.44           | 56.4                 | 191 (191)                                               |

|                        |       |                           |      |       |           |
|------------------------|-------|---------------------------|------|-------|-----------|
| Azerbaijan             | 0.683 | 4.98<br>(3.94 to 6.28)    | 2.49 | 2.49  | 10 (6)    |
| Bahrain                | 0.751 | 21.57<br>(17 to 27.14)    | 2.49 | 19.09 | 131 (130) |
| Bangladesh             | 0.483 | 14.78<br>(9.74 to 21.06)  | 3.65 | 11.13 | 59 (61)   |
| Barbados               | 0.742 | 23.49<br>(19.23 to 28.46) | 2.49 | 21    | 139 (138) |
| Belarus                | 0.745 | 6.11<br>(4.69 to 8)       | 2.49 | 3.62  | 19 (15)   |
| Belgium                | 0.851 | 59.52<br>(49.61 to 66.56) | 2.49 | 57.03 | 192 (192) |
| Belize                 | 0.603 | 11.36<br>(9.27 to 14.55)  | 2.48 | 8.88  | 40 (34)   |
| Benin                  | 0.352 | 14.81<br>(8.5 to 23.48)   | 3.66 | 11.16 | 61 (64)   |
| Bermuda                | 0.813 | 69.18<br>(57.44 to 84.51) | 2.48 | 66.7  | 200 (200) |
| Bhutan                 | 0.455 | 15.37<br>(10.31 to 21.37) | 3.63 | 11.74 | 67 (69)   |
| Bolivia                | 0.566 | 18.54<br>(12.93 to 26.05) | 2.47 | 16.07 | 109 (104) |
| Bosnia and Herzegovina | 0.718 | 24.66<br>(19.24 to 31.55) | 2.48 | 22.18 | 146 (145) |
| Botswana               | 0.634 | 16.7<br>(11.24 to 25.55)  | 2.48 | 14.22 | 89 (84)   |

|                          |       |                           |       |       |           |
|--------------------------|-------|---------------------------|-------|-------|-----------|
| Brazil                   | 0.64  | 29.2<br>(26.27 to 33.44)  | 2.49  | 26.71 | 160 (160) |
| Brunei                   | 0.823 | 49.33<br>(40.45 to 57.24) | 2.49  | 46.84 | 182 (182) |
| Bulgaria                 | 0.764 | 14.32<br>(10.91 to 18.36) | 2.49  | 11.83 | 69 (59)   |
| Burkina Faso             | 0.257 | 17.72<br>(10.03 to 27.6)  | 11.88 | 5.84  | 31 (94)   |
| Burundi                  | 0.284 | 15.33<br>(10.27 to 22.05) | 4.62  | 10.71 | 53 (67)   |
| Cote d'Ivoire            | 0.408 | 13.91<br>(8.24 to 21.67)  | 3.65  | 10.26 | 52 (56)   |
| Cambodia                 | 0.469 | 4.54<br>(3.3 to 7.07)     | 3.65  | 0.89  | 2 (4)     |
| Cameroon                 | 0.49  | 17.17<br>(10.31 to 27.69) | 3.65  | 13.52 | 81 (90)   |
| Canada                   | 0.873 | 37.11<br>(32.16 to 40.74) | 2.47  | 34.64 | 164 (164) |
| Cape Verde               | 0.525 | 16.76<br>(13.23 to 21.63) | 2.48  | 14.28 | 91 (85)   |
| Central African Republic | 0.274 | 20.84<br>(11.36 to 32.88) | 4.97  | 15.87 | 107 (122) |
| Chad                     | 0.238 | 13.62<br>(7.54 to 22.27)  | 11.87 | 1.76  | 5 (52)    |
| Chile                    | 0.759 | 27.65<br>(24.67 to 31.54) | 2.49  | 25.16 | 156 (156) |

|                     |       |                           |      |       |           |
|---------------------|-------|---------------------------|------|-------|-----------|
| China               | 0.686 | 4.09<br>(3.32 to 4.93)    | 2.49 | 1.61  | 4 (1)     |
| Colombia            | 0.633 | 27.75<br>(19.88 to 38.91) | 2.49 | 25.26 | 157 (157) |
| Comoros             | 0.455 | 15.42<br>(11.19 to 20.97) | 3.66 | 11.76 | 68 (70)   |
| Congo (Brazzaville) | 0.568 | 21.02<br>(14.99 to 29.69) | 2.49 | 18.53 | 127 (124) |
| Cook Islands        | 0.764 | 9.04<br>(7.13 to 11.25)   | 2.49 | 6.55  | 34 (29)   |
| Costa Rica          | 0.68  | 28.45<br>(21.73 to 36.52) | 2.49 | 25.96 | 158 (158) |
| Croatia             | 0.794 | 52.25<br>(38.1 to 66.05)  | 2.49 | 49.76 | 185 (185) |
| Cuba                | 0.668 | 23.68<br>(17.91 to 31.98) | 2.49 | 21.19 | 142 (141) |
| Cyprus              | 0.841 | 96.09<br>(82.4 to 111.43) | 2.48 | 93.61 | 204 (204) |
| Denmark             | 0.89  | 54.88<br>(47.22 to 61.42) | 2.49 | 52.39 | 188 (188) |
| Djibouti            | 0.459 | 18.14<br>(12.25 to 26.66) | 3.65 | 14.49 | 94 (101)  |
| Dominica            | 0.729 | 21.85<br>(16.71 to 28.27) | 2.49 | 19.36 | 133 (133) |
| Dominican Republic  | 0.592 | 17.96<br>(13.45 to 23.65) | 2.48 | 15.47 | 104 (99)  |

|                                   |       |                           |      |       |           |
|-----------------------------------|-------|---------------------------|------|-------|-----------|
| DR Congo                          | 0.382 | 18.35<br>(11.78 to 27.38) | 3.65 | 14.7  | 96 (102)  |
| Ecuador                           | 0.64  | 19.66<br>(15.01 to 25.26) | 2.49 | 17.17 | 117 (113) |
| Egypt                             | 0.658 | 27.43<br>(19.63 to 38.9)  | 2.49 | 24.95 | 155 (155) |
| El Salvador                       | 0.573 | 7.2<br>(5.33 to 9.48)     | 2.48 | 4.72  | 24 (20)   |
| Equatorial Guinea                 | 0.685 | 19.96<br>(12.78 to 29.04) | 2.49 | 17.47 | 118 (116) |
| Eritrea                           | 0.396 | 17.92<br>(11.75 to 26.67) | 3.65 | 14.27 | 90 (98)   |
| Estonia                           | 0.835 | 46.34<br>(34.76 to 60.71) | 2.49 | 43.85 | 176 (176) |
| eSwatini                          | 0.577 | 16.07<br>(10.25 to 24.76) | 2.49 | 13.58 | 83 (76)   |
| Ethiopia                          | 0.343 | 12.56<br>(9.15 to 17.29)  | 3.67 | 8.9   | 41 (43)   |
| Federated States of<br>Micronesia | 0.58  | 24.43<br>(14.18 to 38.62) | 2.49 | 21.94 | 145 (144) |
| Fiji                              | 0.664 | 9.35<br>(7.33 to 11.82)   | 2.48 | 6.87  | 35 (30)   |
| Finland                           | 0.856 | 66.09<br>(57.31 to 75.68) | 2.49 | 63.6  | 198 (198) |
| France                            | 0.834 | 47.76<br>(40.45 to 53.44) | 2.48 | 45.28 | 180 (180) |

|               |       |                           |      |       |           |
|---------------|-------|---------------------------|------|-------|-----------|
| Gabon         | 0.656 | 22.71<br>(17.19 to 29.54) | 2.47 | 20.24 | 134 (134) |
| Georgia       | 0.702 | 14.79<br>(10.79 to 22)    | 2.49 | 12.31 | 73 (62.5) |
| Georgia       | 0.841 | 14.79<br>(10.79 to 22)    | 2.49 | 12.31 | 72 (62.5) |
| Germany       | 0.898 | 67.99<br>(59.54 to 75.86) | 2.49 | 65.5  | 199 (199) |
| Ghana         | 0.557 | 13.62<br>(8.44 to 21.87)  | 2.49 | 11.13 | 60 (53)   |
| Greece        | 0.794 | 45.23<br>(39.85 to 52.25) | 2.47 | 42.75 | 175 (175) |
| Greenland     | 0.761 | 60.2<br>(37.11 to 84.43)  | 2.49 | 57.72 | 194 (194) |
| Grenada       | 0.669 | 24.67<br>(20.41 to 32.06) | 2.47 | 22.2  | 147 (146) |
| Guam          | 0.813 | 40.66<br>(33.21 to 49)    | 2.49 | 38.17 | 168 (168) |
| Guatemala     | 0.526 | 7.07<br>(5.44 to 9.12)    | 2.49 | 4.58  | 23 (19)   |
| Guinea        | 0.325 | 15.5<br>(8.92 to 24.68)   | 3.66 | 11.84 | 70 (71)   |
| Guinea-Bissau | 0.355 | 18.64<br>(9.28 to 32.41)  | 3.66 | 14.99 | 98 (106)  |
| Guyana        | 0.618 | 46.48<br>(35.06 to 61.5)  | 2.48 | 44    | 177 (177) |

|           |       |                           |      |       |           |
|-----------|-------|---------------------------|------|-------|-----------|
| Haiti     | 0.432 | 25.51<br>(14.35 to 40.74) | 3.65 | 21.86 | 144 (149) |
| Honduras  | 0.496 | 15.9<br>(12.49 to 20.31)  | 2.53 | 13.37 | 79 (75)   |
| Hungary   | 0.791 | 75.23<br>(60.38 to 89.89) | 2.49 | 72.74 | 202 (202) |
| Iceland   | 0.869 | 49.42<br>(42.05 to 55.92) | 2.47 | 46.95 | 183 (183) |
| India     | 0.566 | 13.33<br>(9.88 to 17.6)   | 2.48 | 10.85 | 56 (49)   |
| Indonesia | 0.66  | 6.11<br>(4.13 to 8.51)    | 2.49 | 3.62  | 18 (14)   |
| Iran      | 0.67  | 20.63<br>(18.56 to 23.89) | 2.49 | 18.14 | 124 (120) |
| Iraq      | 0.671 | 8.52<br>(5.73 to 11.35)   | 2.48 | 6.04  | 33 (28)   |
| Ireland   | 0.867 | 42.15<br>(37.07 to 47.64) | 2.48 | 39.67 | 170 (170) |
| Israel    | 0.803 | 43.78<br>(37.54 to 49.17) | 2.49 | 41.29 | 173 (173) |
| Italy     | 0.801 | 34.69<br>(28.94 to 39.17) | 2.49 | 32.21 | 163 (163) |
| Jamaica   | 0.684 | 7.42<br>(5.72 to 9.82)    | 2.49 | 4.93  | 26 (22)   |
| Japan     | 0.87  | 26.55<br>(21.26 to 30.4)  | 2.49 | 24.06 | 150 (150) |

|            |       |                           |      |       |           |
|------------|-------|---------------------------|------|-------|-----------|
| Jordan     | 0.731 | 10.1<br>(8.25 to 12.37)   | 2.49 | 7.61  | 37 (32)   |
| Kazakhstan | 0.723 | 5.67<br>(4.59 to 7.3)     | 2.48 | 3.19  | 16 (12)   |
| Kenya      | 0.508 | 16.1<br>(12.5 to 20.78)   | 2.51 | 13.59 | 84 (77)   |
| Kiribati   | 0.527 | 16.95<br>(12.01 to 26.39) | 2.49 | 14.47 | 93 (88)   |
| Kuwait     | 0.851 | 17.9<br>(14.75 to 21.25)  | 2.49 | 15.41 | 102 (97)  |
| Kyrgyzstan | 0.596 | 4.5<br>(3.66 to 5.47)     | 2.49 | 2.02  | 8 (3)     |
| Laos       | 0.49  | 5.49<br>(3.97 to 8.06)    | 3.65 | 1.84  | 7 (10)    |
| Latvia     | 0.82  | 23.6<br>(18.84 to 29.72)  | 2.49 | 21.11 | 141 (140) |
| Lebanon    | 0.708 | 26.75<br>(16.79 to 40.25) | 2.48 | 24.27 | 152 (152) |
| Lesotho    | 0.507 | 17.82<br>(11.05 to 28.49) | 2.53 | 15.3  | 101 (96)  |
| Liberia    | 0.37  | 13.21<br>(7.72 to 20.93)  | 3.67 | 9.54  | 49 (47)   |
| Libya      | 0.709 | 18.54<br>(11.25 to 26.54) | 2.49 | 16.05 | 108 (103) |
| Lithuania  | 0.843 | 20.01<br>(15.63 to 24.93) | 2.48 | 17.52 | 119 (117) |



|                  |       |                           |       |       |           |
|------------------|-------|---------------------------|-------|-------|-----------|
| Luxembourg       | 0.895 | 60.92<br>(51.18 to 71.65) | 2.47  | 58.45 | 195 (195) |
| Madagascar       | 0.396 | 24.22<br>(16.13 to 34.01) | 3.65  | 20.56 | 135 (143) |
| Malawi           | 0.384 | 16.81<br>(12.25 to 22.75) | 3.65  | 13.16 | 77 (86)   |
| Malaysia         | 0.737 | 10.21<br>(7.91 to 13.16)  | 2.49  | 7.72  | 38 (33)   |
| Maldives         | 0.562 | 11.56<br>(9.19 to 14.32)  | 2.49  | 9.07  | 44 (36)   |
| Mali             | 0.263 | 12.9<br>(7.29 to 21.99)   | 11.88 | 1.02  | 3 (46)    |
| Malta            | 0.801 | 27.01<br>(22.89 to 31.14) | 2.49  | 24.52 | 153 (153) |
| Marshall Islands | 0.544 | 23.29<br>(14.36 to 35.29) | 2.49  | 20.8  | 137 (136) |
| Mauritania       | 0.496 | 11.7<br>(7.96 to 17.46)   | 2.51  | 9.19  | 45 (38)   |
| Mauritius        | 0.705 | 15.56<br>(12.28 to 19.71) | 2.49  | 13.07 | 76 (72)   |
| Mexico           | 0.649 | 16.3<br>(13.51 to 19.42)  | 2.49  | 13.81 | 87 (81)   |
| Moldova          | 0.696 | 6.88<br>(5.4 to 9.07)     | 2.49  | 4.39  | 20 (16)   |
| Monaco           | 0.902 | 16.91<br>(13.26 to 21.17) | 2.47  | 14.44 | 92 (87)   |

|             |       |                           |       |       |           |
|-------------|-------|---------------------------|-------|-------|-----------|
| Mongolia    | 0.606 | 7.33<br>(5.14 to 12.01)   | 2.48  | 4.85  | 25 (21)   |
| Montenegro  | 0.791 | 12.62<br>(10.17 to 16.09) | 2.49  | 10.13 | 50 (45)   |
| Morocco     | 0.548 | 21.77<br>(15.39 to 29.22) | 2.49  | 19.28 | 132 (132) |
| Mozambique  | 0.307 | 21.08<br>(14.55 to 28.62) | 4.47  | 16.61 | 114 (125) |
| Myanmar     | 0.521 | 5.35<br>(4.04 to 7.69)    | 2.45  | 2.9   | 13 (9)    |
| Namibia     | 0.612 | 15.65<br>(11.57 to 21.76) | 2.48  | 13.17 | 78 (73)   |
| Nauru       | 0.618 | 27.41<br>(17.24 to 40.73) | 2.49  | 24.92 | 154 (154) |
| Nepal       | 0.422 | 15.32<br>(10.78 to 20.95) | 3.65  | 11.67 | 65 (66)   |
| Netherlands | 0.883 | 60<br>(49.94 to 68.18)    | 2.49  | 57.51 | 193 (193) |
| New Zealand | 0.84  | 63.13<br>(54.19 to 70.31) | 2.49  | 60.64 | 196 (196) |
| Nicaragua   | 0.517 | 8.42<br>(6.65 to 10.93)   | 2.49  | 5.94  | 32 (27)   |
| Niger       | 0.162 | 12.56<br>(7.08 to 20.52)  | 12.33 | 0.23  | 1 (42)    |
| Nigeria     | 0.515 | 11.68<br>(7.9 to 16.99)   | 2.49  | 9.19  | 46 (37)   |

|                          |       |                           |      |       |           |
|--------------------------|-------|---------------------------|------|-------|-----------|
| Niue                     | 0.711 | 18.93<br>(14.1 to 25.38)  | 2.49 | 16.45 | 113 (108) |
| North Korea              | 0.558 | 5.49<br>(3.96 to 7.86)    | 2.48 | 3.01  | 15 (11)   |
| North Macedonia          | 0.744 | 15.33<br>(12.18 to 19.04) | 2.47 | 12.86 | 75 (68)   |
| Northern Mariana Islands | 0.771 | 56.46<br>(45.35 to 69.14) | 2.49 | 53.97 | 189 (189) |
| Norway                   | 0.913 | 64.27<br>(53.86 to 71.4)  | 2.49 | 61.78 | 197 (197) |
| Oman                     | 0.783 | 28.65<br>(19.46 to 39.02) | 2.49 | 26.16 | 159 (159) |
| Pakistan                 | 0.449 | 17.22<br>(11 to 23.67)    | 3.65 | 13.57 | 82 (92)   |
| Palau                    | 0.738 | 6.99<br>(5.39 to 9.03)    | 2.44 | 4.55  | 22 (18)   |
| Palestine                | 0.588 | 7.51<br>(6.13 to 9.52)    | 2.49 | 5.03  | 27 (23)   |
| Panama                   | 0.686 | 11.89<br>(8.99 to 15.76)  | 2.48 | 9.41  | 47 (39)   |
| Papua New Guinea         | 0.394 | 14.53<br>(8.56 to 22.46)  | 3.65 | 10.89 | 57 (60)   |
| Paraguay                 | 0.638 | 42.55<br>(31.44 to 55.98) | 2.45 | 40.1  | 171 (171) |
| Peru                     | 0.648 | 7.56<br>(5.5 to 10.22)    | 2.49 | 5.07  | 28 (25)   |

|                                     |       |                           |      |       |           |
|-------------------------------------|-------|---------------------------|------|-------|-----------|
| Philippines                         | 0.623 | 4.31<br>(3.48 to 5.27)    | 2.49 | 1.82  | 6 (2)     |
| Poland                              | 0.802 | 37.7<br>(28.53 to 47.55)  | 2.49 | 35.21 | 165 (165) |
| Portugal                            | 0.743 | 44.28<br>(38.56 to 49.42) | 2.49 | 41.79 | 174 (174) |
| Puerto Rico                         | 0.814 | 23.79<br>(18.72 to 29.71) | 2.49 | 21.29 | 143 (142) |
| Qatar                               | 0.83  | 16.32<br>(12.27 to 21.65) | 2.49 | 13.83 | 88 (82)   |
| Romania                             | 0.76  | 25.39<br>(19.77 to 33.98) | 2.48 | 22.91 | 149 (148) |
| Russia                              | 0.805 | 16.11<br>(12.86 to 20.07) | 2.49 | 13.62 | 85 (78)   |
| Rwanda                              | 0.429 | 18.85<br>(13.36 to 27.14) | 3.65 | 15.2  | 99 (107)  |
| Saint Kitts and Nevis               | 0.746 | 21.01<br>(16.54 to 26.94) | 2.49 | 18.52 | 126 (123) |
| Saint Lucia                         | 0.67  | 19.56<br>(16.12 to 24.09) | 2.47 | 17.09 | 116 (112) |
| Saint Vincent and the<br>Grenadines | 0.627 | 23.11<br>(19.13 to 29.03) | 2.49 | 20.62 | 136 (135) |
| Samoa                               | 0.641 | 18.1<br>(13.22 to 24.94)  | 2.48 | 15.62 | 106 (100) |
| San Marino                          | 0.884 | 30.56<br>(20.74 to 43.9)  | 2.47 | 28.09 | 161 (161) |

|                 |       |                            |       |       |           |
|-----------------|-------|----------------------------|-------|-------|-----------|
| Saudi Arabia    | 0.805 | 13.48<br>(10.27 to 17.58)  | 2.48  | 11    | 58 (51)   |
| Senegal         | 0.389 | 12.61<br>(8.36 to 18.17)   | 3.66  | 8.96  | 42 (44)   |
| Serbia          | 0.767 | 47.37<br>(37.43 to 59.63)  | 2.46  | 44.91 | 179 (179) |
| Seychelles      | 0.724 | 14.18<br>(11.37 to 17.13)  | 2.47  | 11.71 | 66 (58)   |
| Sierra Leone    | 0.347 | 13.79<br>(8.21 to 20.97)   | 3.65  | 10.14 | 51 (54)   |
| Singapore       | 0.861 | 11.91<br>(9.57 to 14.87)   | 2.48  | 9.42  | 48 (40)   |
| Slovakia        | 0.812 | 31.18<br>(23.63 to 39.19)  | 2.48  | 28.7  | 162 (162) |
| Slovenia        | 0.84  | 91.55<br>(70.09 to 118.18) | 2.48  | 89.07 | 203 (203) |
| Solomon Islands | 0.407 | 19.92<br>(10.63 to 33.07)  | 3.66  | 16.26 | 112 (115) |
| Somalia         | 0.081 | 16.27<br>(9.58 to 26.03)   | 13.26 | 3.01  | 14 (80)   |
| South Africa    | 0.678 | 17.17<br>(14.02 to 19.67)  | 2.49  | 14.69 | 95 (91)   |
| South Korea     | 0.878 | 13.25<br>(11.11 to 15.77)  | 2.49  | 10.76 | 54 (48)   |
| South Sudan     | 0.363 | 12.01<br>(7.9 to 17.57)    | 3.65  | 8.35  | 39 (41)   |

|                               |       |                           |      |       |           |
|-------------------------------|-------|---------------------------|------|-------|-----------|
| Spain                         | 0.767 | 52.55<br>(45.6 to 59.91)  | 2.49 | 50.06 | 186 (186) |
| Sri Lanka                     | 0.69  | 13.83<br>(10.02 to 18.96) | 2.48 | 11.35 | 62 (55)   |
| Sudan                         | 0.515 | 20.7<br>(13.64 to 30.94)  | 2.48 | 18.22 | 125 (121) |
| Suriname                      | 0.636 | 18.54<br>(14.8 to 23.72)  | 2.47 | 16.07 | 110 (105) |
| Sweden                        | 0.872 | 52.66<br>(46.19 to 58.97) | 2.47 | 50.19 | 187 (187) |
| Switzerland                   | 0.929 | 38.09<br>(32.5 to 43.27)  | 2.49 | 35.6  | 167 (167) |
| Syria                         | 0.619 | 37.96<br>(26.75 to 53.41) | 2.49 | 35.48 | 166 (166) |
| Taiwan (province of<br>China) | 0.868 | 13.33<br>(10.28 to 17.07) | 2.49 | 10.84 | 55 (50)   |
| Tajikistan                    | 0.539 | 5.08<br>(4.04 to 6.34)    | 2.49 | 2.59  | 11 (7)    |
| Tanzania                      | 0.423 | 19.1<br>(13.28 to 27.13)  | 3.65 | 15.45 | 103 (109) |
| Thailand                      | 0.687 | 6.95<br>(5.16 to 9.24)    | 2.49 | 4.46  | 21 (17)   |
| The Bahamas                   | 0.796 | 21.49<br>(17.38 to 27.21) | 2.49 | 19    | 130 (129) |
| The Gambia                    | 0.399 | 15.13<br>(9.58 to 22.97)  | 3.65 | 11.47 | 63 (65)   |

|                      |       |                           |      |       |           |
|----------------------|-------|---------------------------|------|-------|-----------|
| Timor-Leste          | 0.514 | 4.89<br>(3.02 to 7.56)    | 2.49 | 2.4   | 9 (5)     |
| Togo                 | 0.417 | 15.77<br>(9.22 to 25.57)  | 3.65 | 12.12 | 71 (74)   |
| Tokelau              | 0.626 | 17.25<br>(12.81 to 23.9)  | 2.49 | 14.77 | 97 (93)   |
| Tonga                | 0.636 | 16.13<br>(11.57 to 21.98) | 2.48 | 13.64 | 86 (79)   |
| Trinidad and Tobago  | 0.757 | 14.09<br>(10.35 to 18.97) | 2.49 | 11.6  | 64 (57)   |
| Tunisia              | 0.672 | 20.38<br>(12.77 to 29.56) | 2.49 | 17.89 | 122 (119) |
| Turkey               | 0.748 | 19.24<br>(14.48 to 24.5)  | 2.47 | 16.77 | 115 (111) |
| Turkmenistan         | 0.67  | 5.16<br>(4.05 to 6.76)    | 2.48 | 2.68  | 12 (8)    |
| Tuvalu               | 0.589 | 20.32<br>(14.39 to 28.59) | 2.49 | 17.83 | 121 (118) |
| Uganda               | 0.404 | 16.33<br>(12.15 to 22.2)  | 3.66 | 12.67 | 74 (83)   |
| UK                   | 0.847 | 50.78<br>(45.49 to 55.33) | 2.48 | 48.3  | 184 (184) |
| Ukraine              | 0.736 | 8.23<br>(6.66 to 10.13)   | 2.48 | 5.75  | 30 (26)   |
| United Arab Emirates | 0.88  | 24.93<br>(13.93 to 37.82) | 2.48 | 22.44 | 148 (147) |

|                |       |                           |      |       |           |
|----------------|-------|---------------------------|------|-------|-----------|
| Uruguay        | 0.697 | 73.15<br>(65.09 to 81.49) | 2.48 | 70.67 | 201 (201) |
| USA            | 0.859 | 47.99<br>(42.61 to 52.83) | 2.49 | 45.5  | 181 (181) |
| Uzbekistan     | 0.631 | 9.37<br>(7.01 to 13.08)   | 2.48 | 6.9   | 36 (31)   |
| Vanuatu        | 0.485 | 19.23<br>(12.23 to 28.18) | 3.65 | 15.58 | 105 (110) |
| Venezuela      | 0.607 | 21.35<br>(15.53 to 29.4)  | 2.49 | 18.86 | 129 (128) |
| Vietnam        | 0.617 | 6.08<br>(4.4 to 8.72)     | 2.49 | 3.59  | 17 (13)   |
| Virgin Islands | 0.799 | 43.12<br>(35.12 to 52.17) | 2.46 | 40.66 | 172 (172) |
| Yemen          | 0.412 | 21.61<br>(14.46 to 30.96) | 3.65 | 17.97 | 123 (131) |
| Zambia         | 0.505 | 23.45<br>(17.21 to 31.97) | 2.51 | 20.94 | 138 (137) |
| Zimbabwe       | 0.476 | 17.03<br>(12.37 to 24.34) | 3.65 | 13.38 | 80 (89)   |

DALYs, disability-adjusted life years; SDI, socio-demographic index; UI: uncertainty interval.
