# Supplementary material for: Global Burden and Improvement Gap of Non-Rheumatic Calcific Aortic Valve Disease: 1990–2019 Findings from Global Burden of Disease Study 2019
Source: MDPI journal article supplement (doi:10.3390/jcm11226733), 2022-11-14
Supplement: s1 [file s1]

Table S3. The DALYs and age-standardized DALYs rate of non-rheumatic calcific aortic valve disease in 1990 and 2019 and its temporal trends from 1990 to 2019.

|                           | 1990                          |                                    | 2019                            |                               | 1990–2019                     | 1990–2019                 |
|---------------------------|-------------------------------|------------------------------------|---------------------------------|-------------------------------|-------------------------------|---------------------------|
|                           | Cases                         | Age-standardized DALY              | Cases                           | Age-standardized DALY rate    | Age-standardized DALY rate    | AAPC No.                  |
|                           | No. (95% UI)                  | rate (per 100,000)<br>No. (95% UI) | No. (95% UI)                    | (per 100,000)<br>No. (95% UI) | Percentage change<br>(95% UI) | (95% CI)                  |
| Global                    | 975894<br>(872009 to 1109788) | 26.85<br>(24.07 to 30.31)          | 1837751<br>(1637023 to 2031852) | 23.9<br>(21.1 to 26.55)       | -10.97<br>(-17.94 to -3.46)   | -0.33<br>(-0.48 to -0.19) |
| Female                    | 442232<br>(381940 to 551815)  | 22.3<br>(19.27 to 27.31)           | 893719<br>(765940 to 1032792)   | 20.48<br>(17.55 to 23.69)     | -8.18<br>(-17.87 to 1.21)     | -0.22<br>(-0.39 to -0.04) |
| Male                      | 533661<br>(481123 to 594233)  | 31.47<br>(28.7 to 34.63)           | 944032<br>(864570 to 1036413)   | 27.4<br>(24.8 to 29.99)       | -12.94<br>(-19.92 to -4.25)   | -0.42<br>(-0.56 to -0.29) |
| High SDI                  | 553755<br>(508564 to 609841)  | 52.88<br>(48.59 to 58.27)          | 913672<br>(778952 to 1005197)   | 42.88<br>(37.5 to 47)         | -18.9<br>(-24.94 to -13.51)   | -0.68<br>(-0.78 to -0.57) |
| High-middle SDI           | 178055<br>(162774 to 197284)  | 17.25<br>(15.73 to 19.19)          | 395647<br>(353615 to 437845)    | 20.21<br>(18.01 to 22.35)     | 17.15<br>(2.71 to 29.36)      | 0.51<br>(0.38 to 0.64)    |
| Middle SDI                | 121004<br>(98914 to 146117)   | 10.48<br>(8.62 to 12.68)           | 251024<br>(227014 to 281657)    | 10.18<br>(9.21 to 11.4)       | -2.79<br>(-17.93 to 21.45)    | -0.13<br>(-0.19 to -0.08) |
| Low-middle SDI            | 81108<br>(53195 to 111592)    | 12.97<br>(8.69 to 17.57)           | 187228<br>(149865 to 235314)    | 13.56<br>(10.9 to 16.84)      | 4.53<br>(-12.79 to 34.18)     | 0.16<br>(0.09 to 0.23)    |
| Low SDI                   | 41391<br>(22473 to 63108)     | 16.14<br>(9.28 to 23.73)           | 89078<br>(62680 to 119761)      | 15.8<br>(11.57 to 20.29)      | -2.11<br>(-22.92 to 34.05)    | -0.12<br>(-0.15 to -0.08) |
| High-income Asia Pacific  | 70903<br>(63434 to 81928)     | 38.17<br>(33.96 to 44.37)          | 142126<br>(109597 to 165943)    | 24.46<br>(19.89 to 28.22)     | -35.91<br>(-45.57 to -27.93)  | -1.49<br>(-1.81 to -1.16) |
| High-income North America | 206708<br>(189977 to 224974)  | 57.8<br>(53.37 to 62.81)           | 314811<br>(274623 to 346354)    | 46.8<br>(41.53 to 51.25)      | -19.04<br>(-24.18 to -14)     | -0.73<br>(-0.93 to -0.54) |
| Western Europe            | 321786<br>(294953 to 357151)  | 55.48<br>(50.82 to 61.36)          | 543784<br>(471461 to 598088)    | 51.94<br>(45.69 to 56.95)     | -6.38<br>(-14.12 to 1.55)     | -0.17<br>(-0.3 to -0.03)  |
| Australasia               | 12154<br>(11119 to 13476)     | 52.52<br>(47.85 to 58.16)          | 23975<br>(20443 to 27499)       | 44.54<br>(38.48 to 51.02)     | -15.19<br>(-23.88 to -5.18)   | -0.52<br>(-0.74 to -0.3)  |
| Andean Latin              | 3304                          | 13.67                              | 7264                            | 12.54                         | -8.29                         | -0.2                      |

|                  |  |                   |                  |                    |                  |                    |                  |
|------------------|--|-------------------|------------------|--------------------|------------------|--------------------|------------------|
| America          |  | (2471 to 4283)    | (10.36 to 17.42) | (5877 to 8871)     | (10.21 to 15.28) | (-31.73 to 27.17)  | (-0.41 to 0.01)  |
| Tropical Latin   |  | 43137             | 41.46            | 70731              | 29.5             | -28.84             | -1.16            |
| America          |  | (38392 to 47877)  | (36.63 to 45.36) | (63569 to 80921)   | (26.5 to 33.74)  | (-34.8 to -20.16)  | (-1.25 to -1.07) |
| Central Latin    |  | 18125             | 18.85            | 44870              | 18.72            | -0.73              | -0.07            |
| America          |  | (16449 to 20015)  | (17.19 to 20.94) | (36842 to 55560)   | (15.4 to 23.13)  | (-17.42 to 22.44)  | (-0.36 to 0.23)  |
| Southern Latin   |  | 24229             | 54.79            | 42481              | 50.54            | -7.77              | -0.16            |
| America          |  | (21712 to 27031)  | (48.95 to 61.1)  | (38287 to 46438)   | (45.69 to 55.27) | (-18.99 to 4.37)   | (-0.32 to 0)     |
| Caribbean        |  | 6313              | 22.61            | 11324              | 22.09            | -2.27              | 0                |
|                  |  | (5372 to 7234)    | (19.31 to 25.69) | (9158 to 14157)    | (17.87 to 27.65) | (-18.67 to 16.82)  | (-0.18 to 0.18)  |
| Central Europe   |  | 20994             | 14.59            | 84108              | 39.15            | 168.33             | 3.6              |
|                  |  | (18132 to 25377)  | (12.57 to 17.61) | (69743 to 99017)   | (32.37 to 46.15) | (93.69 to 224.57)  | (3.25 to 3.94)   |
| Eastern Europe   |  | 14221             | 5.25             | 46125              | 14.17            | 169.8              | 3.42             |
|                  |  | (11028 to 16353)  | (4.11 to 6.02)   | (37773 to 56568)   | (11.57 to 17.34) | (114.91 to 265.33) | (2.68 to 4.17)   |
| Central Asia     |  | 1757              | 3.48             | 5538               | 7.45             | 113.88             | 2.58             |
|                  |  | (1480 to 1956)    | (2.89 to 3.92)   | (4671 to 6969)     | (6.27 to 9.38)   | (74.11 to 186.27)  | (1.85 to 3.32)   |
| North Africa and |  | 49071             | 24.77            | 100971             | 21.11            | -14.77             | -0.58            |
| Middle East      |  | (36291 to 61474)  | (18.02 to 31.02) | (84200 to 119652)  | (17.59 to 24.72) | (-30.89 to 20.78)  | (-0.65 to -0.52) |
| South Asia       |  | 76867             | 13.86            | 190680             | 13.83            | -0.25              | 0.02             |
|                  |  | (44619 to 111682) | (8.35 to 19.67)  | (144057 to 248601) | (10.63 to 17.66) | (-21.64 to 38.44)  | (-0.14 to 0.19)  |
| Southeast Asia   |  | 17125             | 6.22             | 39382              | 6.49             | 4.38               | 0.21             |
|                  |  | (14082 to 23373)  | (5.14 to 8.24)   | (32225 to 50172)   | (5.36 to 8.18)   | (-16.05 to 35.53)  | (0.13 to 0.29)   |
| East Asia        |  | 46987             | 4.71             | 86816              | 4.36             | -7.57              | -0.24            |
|                  |  | (30302 to 66132)  | (3.06 to 6.62)   | (70962 to 103738)  | (3.59 to 5.18)   | (-38.27 to 53.8)   | (-0.44 to -0.03) |
| Oceania          |  | 542               | 15.64            | 1275               | 15.58            | -0.37              | -0.01            |
|                  |  | (322 to 826)      | (9.68 to 23.28)  | (819 to 1885)      | (10.6 to 22.16)  | (-19.88 to 25.89)  | (-0.12 to 0.09)  |
| Western          |  | 15626             | 15.2             | 31347              | 13.17            | -13.36             | -0.49            |
| Sub-Saharan      |  | (8040 to 24983)   | (8 to 23.99)     | (21263 to 45261)   | (9.11 to 18.49)  | (-35.16 to 27.51)  | (-0.59 to -0.4)  |
| Africa           |  | 15687             | 18.86            | 29973              | 16.91            | -10.36             | -0.4             |
| Eastern          |  | (9220 to 24319)   | (12.21 to 27.88) | (22891 to 39839)   | (13.45 to 21.67) | (-35.05 to 29.79)  | (-0.5 to -0.3)   |
| Sub-Saharan      |  |                   |                  |                    |                  |                    |                  |

|             |                |                  |                 |                  |                   |                  |
|-------------|----------------|------------------|-----------------|------------------|-------------------|------------------|
| Africa      |                |                  |                 |                  |                   |                  |
| Central     |                |                  |                 |                  |                   |                  |
| Sub-Saharan | 4595           | 19.38            | 10426           | 18.97            | -2.11             | -0.11            |
| Africa      | (2589 to 7527) | (11.77 to 30.04) | (6840 to 15597) | (13.23 to 26.91) | (-29.55 to 39.69) | (-0.16 to -0.05) |
| Southern    |                |                  |                 |                  |                   |                  |
| Sub-Saharan | 5763           | 17.96            | 9744            | 17.24            | -4.01             | -0.07            |
| Africa      | (4929 to 7016) | (15.51 to 21.18) | (8365 to 11082) | (14.86 to 19.32) | (-17.76 to 10.29) | (-0.3 to 0.16)   |

---

AAPC, average annual percentage change; DALY, disability-adjusted life-years; SDI, sociodemographic index; UI, uncertainty interval; CI, confidence interval.
