# Supplementary material for: Global Burden and Improvement Gap of Non-Rheumatic Calcific Aortic Valve Disease: 1990–2019 Findings from Global Burden of Disease Study 2019
Source: MDPI journal article supplement (doi:10.3390/jcm11226733), 2022-11-14
Supplement: s1 [file s1]

Table S4. The death cases and age-standardized mortality rate of cardiomyopathy between 1990 and 2019 and its temporal trends from 1990 to 2019.

|                      | 1990             |                    | 2019               |                    | 1990–2019              | 1990–2019        |
|----------------------|------------------|--------------------|--------------------|--------------------|------------------------|------------------|
|                      | Cases            | ASMR (per 100,000) | Cases              | ASMR (per 100,000) | ASMR Percentage change | AAPC No.         |
|                      | No. (95% UI)     | No. (95% UI)       | No. (95% UI)       | No. (95% UI)       | (95% UI)               | (95% CI)         |
| Global               | 53298            | 1.75               | 126827             | 1.76               | 0.37                   | 0.01             |
|                      | (47760 to 59731) | (1.55 to 1.96)     | (105603 to 141390) | (1.45 to 1.97)     | (-8.85 to 7.99)        | (-0.24 to 0.27)  |
| Female               | 28780            | 1.62               | 72652              | 1.66               | 2.05                   | 0.05             |
|                      | (24823 to 34071) | (1.39 to 1.91)     | (57761 to 84305)   | (1.32 to 1.92)     | (-6.84 to 10.75)       | (-0.09 to 0.18)  |
| Male                 | 24517            | 1.86               | 54175              | 1.85               | -0.74                  | -0.15            |
|                      | (22439 to 27031) | (1.69 to 2.04)     | (47774 to 58670)   | (1.58 to 2.01)     | (-9.2 to 9.14)         | (-0.39 to 0.1)   |
| High SDI             | 36015            | 3.46               | 80211              | 3.35               | -3.16                  | -0.01            |
|                      | (32133 to 39860) | (3.06 to 3.84)     | (64300 to 90100)   | (2.75 to 3.74)     | (-11.89 to 3.45)       | (-0.23 to 0.22)  |
| High-middle SDI      | 8359             | 0.93               | 24437              | 1.28               | 36.93                  | 1.03             |
|                      | (7420 to 9206)   | (0.81 to 1.04)     | (20864 to 27261)   | (1.08 to 1.43)     | (21.22 to 53.62)       | (0.89 to 1.17)   |
| Middle SDI           | 4270             | 0.47               | 10479              | 0.48               | 1.1                    | 0.02             |
|                      | (3502 to 5173)   | (0.39 to 0.57)     | (9433 to 11740)    | (0.43 to 0.53)     | (-13.31 to 24.6)       | (-0.05 to 0.08)  |
| Low-middle SDI       | 3120             | 0.65               | 8166               | 0.7                | 7.45                   | 0.26             |
|                      | (2097 to 4200)   | (0.44 to 0.85)     | (6628 to 9989)     | (0.57 to 0.84)     | (-10.49 to 36.84)      | (0.18 to 0.33)   |
| Low SDI              | 1503             | 0.77               | 3465               | 0.8                | 3.66                   | 0.11             |
|                      | (876 to 2199)    | (0.47 to 1.09)     | (2557 to 4390)     | (0.61 to 0.99)     | (-18.37 to 38.65)      | (0.07 to 0.15)   |
| High-income          | 4282             | 2.57               | 13573              | 1.98               | -22.98                 | -1.06            |
|                      | (3659 to 5067)   | (2.15 to 3.06)     | (9085 to 16510)    | (1.4 to 2.36)      | (-37.39 to -12.89)     | (-1.48 to -0.64) |
| High-income          | 13159            | 3.56               | 27187              | 3.64               | 2.29                   | 0.1              |
| North America        | (11623 to 14395) | (3.14 to 3.89)     | (22160 to 30239)   | (3.02 to 4.02)     | (-4.73 to 7.84)        | (-0.08 to 0.27)  |
| Western Europe       | 21104            | 3.59               | 47894              | 4.05               | 12.79                  | 0.41             |
|                      | (18958 to 23334) | (3.21 to 3.97)     | (39520 to 53660)   | (3.4 to 4.51)      | (2.47 to 21.66)        | (0.22 to 0.6)    |
| Australasia          | 771              | 3.48               | 1866               | 3.18               | -8.66                  | -0.22            |
|                      | (686 to 852)     | (3.07 to 3.85)     | (1514 to 2108)     | (2.62 to 3.58)     | (-17.99 to -0.51)      | (-0.52 to 0.08)  |
| Andean Latin America | 118              | 0.58               | 291                | 0.53               | -9.6                   | -0.18            |
|                      | (90 to 147)      | (0.45 to 0.71)     | (237 to 353)       | (0.43 to 0.64)     | (-30.38 to 23.36)      | (-0.45 to 0.09)  |

|                 |        |                |                |                 |                |                    |                  |
|-----------------|--------|----------------|----------------|-----------------|----------------|--------------------|------------------|
| Tropical        | Latin  | 1533           | 1.81           | 3583            | 1.56           | -14.04             | -0.47            |
| America         |        | (1350 to 1664) | (1.59 to 1.95) | (3115 to 4139)  | (1.34 to 1.8)  | (-22.45 to -2.22)  | (-0.56 to -0.37) |
| Central         | Latin  | 657            | 0.81           | 1955            | 0.85           | 5.44               | 0.17             |
| America         |        | (599 to 733)   | (0.74 to 0.9)  | (1607 to 2430)  | (0.7 to 1.06)  | (-11.75 to 28.89)  | (-0.09 to 0.43)  |
| Southern        | Latin  | 1386           | 3.43           | 2844            | 3.3            | -3.94              | 0.01             |
| America         |        | (1216 to 1558) | (3.01 to 3.85) | (2455 to 3158)  | (2.85 to 3.66) | (-15.56 to 9.78)   | (-0.41 to 0.43)  |
| Caribbean       |        | 253            | 1              | 516             | 1              | -0.42              | 0.13             |
|                 |        | (218 to 283)   | (0.87 to 1.12) | (422 to 626)    | (0.82 to 1.22) | (-16.89 to 18.21)  | (-0.05 to 0.32)  |
| Central Europe  |        | 903            | 0.66           | 4675            | 2.08           | 215.7              | 4.26             |
|                 |        | (751 to 1111)  | (0.54 to 0.81) | (3771 to 5584)  | (1.68 to 2.49) | (125.02 to 305.48) | (3.74 to 4.78)   |
| Eastern Europe  |        | 562            | 0.21           | 1640            | 0.48           | 125.97             | 2.67             |
|                 |        | (439 to 632)   | (0.17 to 0.24) | (1374 to 1929)  | (0.4 to 0.57)  | (86.09 to 203.26)  | (2.03 to 3.32)   |
| Central Asia    |        | 63             | 0.14           | 207             | 0.33           | 138.86             | 3.09             |
|                 |        | (51 to 73)     | (0.11 to 0.16) | (172 to 264)    | (0.27 to 0.43) | (86.15 to 243.85)  | (2.32 to 3.87)   |
| North           | Africa | 1729           | 1.13           | 3819            | 0.97           | -14.33             | -0.54            |
| and Middle East |        | (1260 to 2179) | (0.82 to 1.45) | (3193 to 4444)  | (0.81 to 1.12) | (-30.12 to 21.53)  | (-0.7 to -0.37)  |
| South Asia      |        | 3063           | 0.75           | 8749            | 0.76           | 1.29               | 0.02             |
|                 |        | (1848 to 4366) | (0.47 to 1.03) | (6846 to 11048) | (0.6 to 0.95)  | (-21.06 to 39.53)  | (-0.33 to 0.38)  |
| Southeast Asia  |        | 656            | 0.3            | 1703            | 0.33           | 10.36              | 0.42             |
|                 |        | (542 to 862)   | (0.24 to 0.38) | (1401 to 2132)  | (0.27 to 0.41) | (-9.53 to 43.36)   | (0.29 to 0.55)   |
| East Asia       |        | 1568           | 0.19           | 3231            | 0.17           | -8.43              | -0.21            |
|                 |        | (1021 to 2224) | (0.12 to 0.27) | (2621 to 3846)  | (0.14 to 0.2)  | (-39.85 to 53.54)  | (-0.49 to 0.06)  |
| Oceania         |        | 18             | 0.79           | 41              | 0.75           | -4.56              | -0.19            |
|                 |        | (11 to 26)     | (0.52 to 1.12) | (28 to 59)      | (0.54 to 1.04) | (-23.57 to 19.87)  | (-0.32 to -0.05) |
| Western         |        | 512            | 0.6            | 1018            | 0.55           | -8.36              | -0.31            |
| Sub-Saharan     |        | (272 to 815)   | (0.33 to 0.95) | (710 to 1424)   | (0.39 to 0.76) | (-29.83 to 31.38)  | (-0.39 to -0.23) |
| Africa          |        |                |                |                 |                |                    |                  |
| Eastern         |        | 574            | 0.94           | 1195            | 0.92           | -1.97              | -0.09            |
| Sub-Saharan     |        | (377 to 850)   | (0.66 to 1.34) | (952 to 1527)   | (0.72 to 1.21) | (-27.46 to 34.25)  | (-0.17 to 0)     |
| Africa          |        |                |                |                 |                |                    |                  |

|                                   |                     |                        |                     |                        |                           |                        |
|-----------------------------------|---------------------|------------------------|---------------------|------------------------|---------------------------|------------------------|
| Central<br>Sub-Saharan<br>Africa  | 169<br>(102 to 263) | 0.97<br>(0.63 to 1.42) | 410<br>(287 to 579) | 1.01<br>(0.74 to 1.36) | 3.51<br>(-23.88 to 44.84) | 0.09<br>(0.01 to 0.16) |
| Southern<br>Sub-Saharan<br>Africa | 219<br>(190 to 253) | 0.9<br>(0.78 to 1.04)  | 430<br>(371 to 480) | 0.96<br>(0.82 to 1.07) | 6.39<br>(-6.57 to 20.29)  | 0.38<br>(0.11 to 0.66) |

---

AAPC, average annual percentage change; ASMR, age-standardized mortality rate; SDI, sociodemographic index; UI, uncertainty interval; CI, confidence interval.
