# Supplementary material for: Global Burden and Improvement Gap of Non-Rheumatic Calcific Aortic Valve Disease: 1990–2019 Findings from Global Burden of Disease Study 2019
Source: MDPI journal article supplement (doi:10.3390/jcm11226733), 2022-11-14
Supplement: s1 [file s1]

Table S5. Changes in DALYs number according to population-level determinants from 1990 to 2019.

|                           | Overall difference <sup>a</sup> | Change due to Population-level determinants<br>(% contribute to the total changes) |                         |                                     |
|---------------------------|---------------------------------|------------------------------------------------------------------------------------|-------------------------|-------------------------------------|
|                           |                                 | Aging <sup>b</sup>                                                                 | Population <sup>c</sup> | Epidemiological change <sup>d</sup> |
| Global                    | 861857.7                        | 437441.997<br>(50.76%)                                                             | 644103.751<br>(74.73%)  | -219688.069<br>(-25.49%)            |
| <b>Sex</b>                |                                 |                                                                                    |                         |                                     |
| Female                    | 451486.8                        | 215325.588<br>(47.69%)                                                             | 304776.407<br>(67.51%)  | -68615.229<br>(-15.2%)              |
| Male                      | 410370.9                        | 224626.884<br>(54.74%)                                                             | 338955.233<br>(82.6%)   | -153211.204<br>(-37.33%)            |
| <b>SDI</b>                |                                 |                                                                                    |                         |                                     |
| High SDI                  | 359916.9                        | 288905.882<br>(80.27%)                                                             | 192942.943<br>(53.61%)  | -121931.97<br>(-33.88%)             |
| High-middle SDI           | 217592.1                        | 92600.64<br>(42.56%)                                                               | 90376.124<br>(41.53%)   | 34615.325<br>(15.91%)               |
| Middle SDI                | 130019.3                        | 53562.555<br>(41.2%)                                                               | 85933.168<br>(66.09%)   | -9476.461<br>(-7.29%)               |
| Low-middle SDI            | 106119.8                        | 25221.164<br>(23.77%)                                                              | 76288.263<br>(71.89%)   | 4610.351<br>(4.34%)                 |
| Low SDI                   | 47687.09                        | -893.339<br>(-1.87%)                                                               | 51800.204<br>(108.63%)  | -3219.775<br>(-6.75%)               |
| <b>Region</b>             |                                 |                                                                                    |                         |                                     |
| High-income Asia Pacific  | 71223.22                        | 93118.761<br>(130.74%)                                                             | 18124.499<br>(25.45%)   | -40020.041<br>(-56.19%)             |
| High-income North America | 108103.1                        | 71409.878<br>(66.06%)                                                              | 78556.599<br>(72.67%)   | -41863.367<br>(-38.73%)             |
| Western Europe            | 221998.1                        | 155153.903<br>(69.89%)                                                             | 66599.498<br>(30%)      | 244.706<br>(0.11%)                  |
| Australasia               | 11821.17                        | 7405.606<br>(62.65%)                                                               | 7038.341<br>(59.54%)    | -2622.778<br>(-22.19%)              |
| Andean Latin America      | 3959.696                        | 1113.853<br>(28.13%)                                                               | 3385.046<br>(85.49%)    | -539.203<br>(-13.62%)               |
| Tropical Latin America    | 27593.39                        | 18575.248<br>(67.32%)                                                              | 31821.137<br>(115.32%)  | -22802.992<br>(-82.64%)             |
| Central Latin America     | 26745.57                        | 9738.641<br>(36.41%)                                                               | 17894.263<br>(66.91%)   | -887.333<br>(-3.32%)                |
| Southern Latin America    | 18251.93                        | 7926.753<br>(43.43%)                                                               | 13089.269<br>(71.71%)   | -2764.097<br>(-15.14%)              |
| Caribbean                 | 5011.07                         | 1883.318<br>(37.58%)                                                               | 3384.755<br>(67.55%)    | -257.003<br>(-5.13%)                |
| Central Europe            | 63114.19                        | 17727.122<br>(28.09%)                                                              | 1317.128<br>(2.09%)     | 44069.939<br>(69.83%)               |

|                                 |          |                       |                        |                         |
|---------------------------------|----------|-----------------------|------------------------|-------------------------|
| Eastern Europe                  | 31903.89 | 5830.385<br>(18.27%)  | -361.012<br>(-1.13%)   | 26434.517<br>(82.86%)   |
| Central Asia                    | 3780.755 | 146.945<br>(3.89%)    | 1369.168<br>(36.21%)   | 2264.642<br>(59.9%)     |
| North Africa and<br>Middle East | 51900.49 | 9165.91<br>(17.66%)   | 55381.679<br>(106.71%) | -12647.098<br>(-24.37%) |
| South Asia                      | 113813.2 | 30766.423<br>(27.03%) | 83414.196<br>(73.29%)  | -367.449<br>(-0.32%)    |
| Southeast Asia                  | 22257.27 | 7404.699<br>(33.27%)  | 14304.552<br>(64.27%)  | 548.02<br>(2.46%)       |
| East Asia                       | 39829.08 | 25869.873<br>(64.95%) | 21504.02<br>(53.99%)   | -7544.813<br>(-18.94%)  |
| Oceania                         | 732.757  | 33.284<br>(4.54%)     | 672.739<br>(91.81%)    | 26.734<br>(3.65%)       |
| Western<br>Sub-Saharan Africa   | 15720.76 | -1242.489<br>(-7.9%)  | 20713.191<br>(131.76%) | -3749.943<br>(-23.85%)  |
| Eastern<br>Sub-Saharan Africa   | 14286.68 | -853.876<br>(-5.98%)  | 19254.765<br>(134.77%) | -4114.213<br>(-28.8%)   |
| Central<br>Sub-Saharan Africa   | 5830.604 | -267.014<br>(-4.58%)  | 6595.087<br>(113.11%)  | -497.469<br>(-8.53%)    |
| Southern<br>Sub-Saharan Africa  | 3980.776 | 954.833<br>(23.99%)   | 4076.031<br>(102.39%)  | -1050.088<br>(-26.38%)  |
| <b>Nation</b>                   |          |                       |                        |                         |
| Afghanistan                     | 2168.015 | -939.417<br>(-43.33%) | 3177.126<br>(146.55%)  | -69.694<br>(-3.21%)     |
| Albania                         | 326.783  | 206.084<br>(63.06%)   | 8.458<br>(2.59%)       | 112.241<br>(34.35%)     |
| Algeria                         | 4078.619 | 1196.225<br>(29.33%)  | 3859.283<br>(94.62%)   | -976.889<br>(-23.95%)   |
| American Samoa                  | 5.737    | 2.432<br>(42.39%)     | 2.189<br>(38.16%)      | 1.116<br>(19.45%)       |
| Andorra                         | 26.768   | 15.543<br>(58.07%)    | 11.403<br>(42.6%)      | -0.178<br>(-0.66%)      |
| Angola                          | 1477.668 | 14.358<br>(0.97%)     | 1497.886<br>(101.37%)  | -34.576<br>(-2.34%)     |
| Antigua and<br>Barbuda          | 7.842    | 0.956<br>(12.19%)     | 7.081<br>(90.3%)       | -0.195<br>(-2.49%)      |
| Argentina                       | 12928    | 4293.72<br>(33.21%)   | 9990.739<br>(77.28%)   | -1356.464<br>(-10.49%)  |
| Armenia                         | 166.928  | 71.521<br>(42.85%)    | 3.286<br>(1.97%)       | 92.121<br>(55.19%)      |
| Australia                       | 9037.299 | 5781.175<br>(63.97%)  | 5761.029<br>(63.75%)   | -2504.905<br>(-27.72%)  |

|                                        |          |                       |                        |                         |
|----------------------------------------|----------|-----------------------|------------------------|-------------------------|
| Austria                                | 6014.939 | 2394.459<br>(39.81%)  | 1448.363<br>(24.08%)   | 2172.117<br>(36.11%)    |
| Azerbaijan                             | 279.587  | 39.16<br>(14.01%)     | 158.543<br>(56.71%)    | 81.884<br>(29.29%)      |
| Bahamas                                | 52.128   | 15.848<br>(30.4%)     | 29.123<br>(55.87%)     | 7.157<br>(13.73%)       |
| Bahrain                                | 133.077  | 29.187<br>(21.93%)    | 118.539<br>(89.08%)    | -14.649<br>(-11.01%)    |
| Bangladesh                             | 12183.63 | 3840.095<br>(31.52%)  | 7487.19<br>(61.45%)    | 856.34<br>(7.03%)       |
| Barbados                               | 45.642   | 17.054<br>(37.36%)    | 21.468<br>(47.04%)     | 7.12<br>(15.6%)         |
| Belarus                                | 529.471  | 138.481<br>(26.15%)   | -16.682<br>(-3.15%)    | 407.672<br>(77%)        |
| Belgium                                | 7766.199 | 4765.772<br>(61.37%)  | 1838.525<br>(23.67%)   | 1161.902<br>(14.96%)    |
| Belize                                 | 25.454   | 1.014<br>(3.98%)      | 18.93<br>(74.37%)      | 5.51<br>(21.65%)        |
| Benin                                  | 576.436  | -28.108<br>(-4.88%)   | 626.733<br>(108.73%)   | -22.189<br>(-3.85%)     |
| Bermuda                                | 12.997   | 37.797<br>(290.81%)   | 11.8<br>(90.79%)       | -36.6<br>(-281.6%)      |
| Bhutan                                 | 55.149   | 20.69<br>(37.52%)     | 22.703<br>(41.17%)     | 11.756<br>(21.32%)      |
| Bolivia<br>(Plurinational State<br>of) | 1023.406 | 204.337<br>(19.97%)   | 868.305<br>(84.84%)    | -49.236<br>(-4.81%)     |
| Bosnia and<br>Herzegovina              | 809.099  | 676.075<br>(83.56%)   | -201.515<br>(-24.91%)  | 334.539<br>(41.35%)     |
| Botswana                               | 143.742  | 14.172<br>(9.86%)     | 135.334<br>(94.15%)    | -5.764<br>(-4.01%)      |
| Brazil                                 | 25763.23 | 18365.766<br>(71.29%) | 30854.822<br>(119.76%) | -23457.358<br>(-91.05%) |
| Brunei Darussalam                      | 82.187   | 19.966<br>(24.29%)    | 43.18<br>(52.54%)      | 19.041<br>(23.17%)      |
| Bulgaria                               | 1126.967 | 355.838<br>(31.57%)   | -199.756<br>(-17.73%)  | 970.885<br>(86.15%)     |
| Burkina Faso                           | 1216.324 | -143.386<br>(-11.79%) | 1172.849<br>(96.43%)   | 186.861<br>(15.36%)     |
| Burundi                                | 176.142  | -70.531<br>(-40.04%)  | 573.301<br>(325.48%)   | -326.628<br>(-185.43%)  |
| Cabo Verde                             | 52.496   | 1.858<br>(3.54%)      | 35.58<br>(67.78%)      | 15.058<br>(28.68%)      |
| Cambodia                               | 323.012  | 84.538                | 268.404                | -29.93                  |

|                                       |          |                      |                       |                        |
|---------------------------------------|----------|----------------------|-----------------------|------------------------|
|                                       |          | (26.17%)             | (83.09%)              | (-9.27%)               |
| Cameroon                              | 1887.17  | -112.372<br>(-5.95%) | 1755.164<br>(93.01%)  | 244.378<br>(12.95%)    |
| Canada                                | 15297.22 | 8476.505<br>(55.41%) | 6363.328<br>(41.6%)   | 457.385<br>(2.99%)     |
| Central African Republic              | 190.42   | -21.467<br>(-11.27%) | 264.266<br>(138.78%)  | -52.379<br>(-27.51%)   |
| Chad                                  | 584.377  | -94.472<br>(-16.17%) | 624.85<br>(106.93%)   | 53.999<br>(9.24%)      |
| Chile                                 | 3141.258 | 1807.292<br>(57.53%) | 2122.188<br>(67.56%)  | -788.222<br>(-25.09%)  |
| China                                 | 35465.78 | 23798.959<br>(67.1%) | 20043.022<br>(56.51%) | -8376.205<br>(-23.62%) |
| Colombia                              | 7334.189 | 4184.039<br>(57.05%) | 5956.851<br>(81.22%)  | -2806.701<br>(-38.27%) |
| Comoros                               | 32.766   | 7.437<br>(22.7%)     | 37.746<br>(115.2%)    | -12.417<br>(-37.9%)    |
| Congo                                 | 274.318  | 14.706<br>(5.36%)    | 358.077<br>(130.53%)  | -98.465<br>(-35.89%)   |
| Cook Islands                          | 0.476    | 0.654<br>(137.39%)   | 0.203<br>(42.65%)     | -0.381<br>(-80.04%)    |
| Costa Rica                            | 1049.748 | 303.595<br>(28.92%)  | 535.663<br>(51.03%)   | 210.49<br>(20.05%)     |
| Croatia                               | 4121.2   | 1129.037<br>(27.4%)  | -187.345<br>(-4.55%)  | 3179.508<br>(77.15%)   |
| Cuba                                  | 1736.763 | 1122.355<br>(64.62%) | 443.703<br>(25.55%)   | 170.705<br>(9.83%)     |
| Cyprus                                | 825.169  | 513.157<br>(62.19%)  | 838.236<br>(101.58%)  | -526.224<br>(-63.77%)  |
| Czechia                               | 8997.236 | 1556.142<br>(17.3%)  | 468.335<br>(5.21%)    | 6972.759<br>(77.5%)    |
| Cote d'Ivoire                         | 1187.926 | 117.103<br>(9.86%)   | 1160.67<br>(97.71%)   | -89.847<br>(-7.56%)    |
| Democratic People's Republic of Korea | 638.3    | 263.473<br>(41.28%)  | 545.685<br>(85.49%)   | -170.858<br>(-26.77%)  |
| Democratic Republic of the Congo      | 3721.039 | -215.321<br>(-5.79%) | 4218.659<br>(113.37%) | -282.299<br>(-7.59%)   |
| Denmark                               | 3651.458 | 1113.558<br>(30.5%)  | 625.464<br>(17.13%)   | 1912.436<br>(52.37%)   |
| Djibouti                              | 79.372   | 18.692<br>(23.55%)   | 69.498<br>(87.56%)    | -8.818<br>(-11.11%)    |
| Dominica                              | 5.15     | 1.782                | 1.491                 | 1.877                  |

|                    |          |                        |                       |                          |
|--------------------|----------|------------------------|-----------------------|--------------------------|
|                    |          | (34.6%)                | (28.95%)              | (36.45%)                 |
| Dominican Republic | 987.857  | 254.06<br>(25.72%)     | 654.099<br>(66.21%)   | 79.698<br>(8.07%)        |
| Ecuador            | 2218.418 | 383.306<br>(17.28%)    | 1214.433<br>(54.74%)  | 620.679<br>(27.98%)      |
| Egypt              | 11538.51 | 641.039<br>(5.56%)     | 9696.622<br>(84.04%)  | 1200.849<br>(10.41%)     |
| El Salvador        | 186.863  | 61.208<br>(32.76%)     | 120.703<br>(64.59%)   | 4.952<br>(2.65%)         |
| Equatorial Guinea  | 58.932   | -24.618<br>(-41.77%)   | 93.736<br>(159.06%)   | -10.186<br>(-17.28%)     |
| Eritrea            | 302.277  | 23.159<br>(7.66%)      | 339.862<br>(112.43%)  | -60.744<br>(-20.1%)      |
| Estonia            | 1110.393 | 269.743<br>(24.29%)    | -73.493<br>(-6.62%)   | 914.143<br>(82.33%)      |
| Eswatini           | 53.431   | 4.907<br>(9.18%)       | 39.767<br>(74.43%)    | 8.757<br>(16.39%)        |
| Ethiopia           | 1598.636 | -119.056<br>(-7.45%)   | 4180.085<br>(261.48%) | -2462.393<br>(-154.03%)  |
| Fiji               | 20.065   | 9.85<br>(49.09%)       | 17.6<br>(87.71%)      | -7.385<br>(-36.81%)      |
| Finland            | 4552.98  | 2972.975<br>(65.3%)    | 915.577<br>(20.11%)   | 664.428<br>(14.59%)      |
| France             | 19435.63 | 30121.013<br>(154.98%) | 11812.801<br>(60.78%) | -22498.186<br>(-115.76%) |
| Gabon              | 108.226  | -11.247<br>(-10.39%)   | 127.204<br>(117.54%)  | -7.731<br>(-7.14%)       |
| Gambia             | 121.478  | 5.608<br>(4.62%)       | 101.175<br>(83.29%)   | 14.695<br>(12.1%)        |
| Georgia            | 630.147  | 162.987<br>(25.86%)    | -198.53<br>(-31.51%)  | 665.69<br>(105.64%)      |
| Germany            | 58261.19 | 45339.249<br>(77.82%)  | 10593.917<br>(18.18%) | 2328.019<br>(4%)         |
| Ghana              | 1725.829 | 87.866<br>(5.09%)      | 1455.705<br>(84.35%)  | 182.258<br>(10.56%)      |
| Greece             | 7068.38  | 4460.238<br>(63.1%)    | 502.13<br>(7.1%)      | 2106.012<br>(29.79%)     |
| Greenland          | 11.607   | 17.93<br>(154.48%)     | 2.164<br>(18.64%)     | -8.487<br>(-73.12%)      |
| Grenada            | 11.256   | 0.709<br>(6.3%)        | 8.818<br>(78.34%)     | 1.729<br>(15.36%)        |
| Guam               | 42.421   | 15.082<br>(35.55%)     | 13.248<br>(31.23%)    | 14.091<br>(33.22%)       |

|                            |          |                       |                      |                         |
|----------------------------|----------|-----------------------|----------------------|-------------------------|
| Guatemala                  | 526.751  | 49.841<br>(9.46%)     | 591.749<br>(112.34%) | -114.839<br>(-21.8%)    |
| Guinea                     | 532.974  | -96.021<br>(-18.02%)  | 535.01<br>(100.38%)  | 93.985<br>(17.63%)      |
| Guinea-Bissau              | 88.297   | -7.993<br>(-9.05%)    | 98.571<br>(111.64%)  | -2.281<br>(-2.58%)      |
| Guyana                     | -9.683   | 74.328<br>(-767.61%)  | 48.217<br>(-497.96%) | -132.228<br>(1365.57%)  |
| Haiti                      | 934.858  | -11.1<br>(-1.19%)     | 1165.24<br>(124.64%) | -219.282<br>(-23.46%)   |
| Honduras                   | 692.869  | 68.495<br>(9.89%)     | 515.976<br>(74.47%)  | 108.398<br>(15.64%)     |
| Hungary                    | 7359.69  | 2740.162<br>(37.23%)  | 29.939<br>(0.41%)    | 4589.589<br>(62.36%)    |
| Iceland                    | 142.608  | 66.699<br>(46.77%)    | 81.651<br>(57.26%)   | -5.742<br>(-4.03%)      |
| India                      | 87779.18 | 27677.674<br>(31.53%) | 64428.159<br>(73.4%) | -4326.65<br>(-4.93%)    |
| Indonesia                  | 7409.75  | 2206.031<br>(29.77%)  | 4569.242<br>(61.67%) | 634.477<br>(8.56%)      |
| Iran (Islamic Republic of) | 8891.234 | 2971.157<br>(33.42%)  | 7594.093<br>(85.41%) | -1674.016<br>(-18.83%)  |
| Iraq                       | 1691.225 | 54.738<br>(3.24%)     | 1447.112<br>(85.57%) | 189.375<br>(11.2%)      |
| Ireland                    | 1214.239 | 595.416<br>(49.04%)   | 997.986<br>(82.19%)  | -379.163<br>(-31.23%)   |
| Israel                     | 3112.834 | 1161.916<br>(37.33%)  | 2457.335<br>(78.94%) | -506.417<br>(-16.27%)   |
| Italy                      | 32967.42 | 15250.622<br>(46.26%) | 3494.335<br>(10.6%)  | 14222.462<br>(43.14%)   |
| Jamaica                    | 115.748  | 15.706<br>(13.57%)    | 57.476<br>(49.66%)   | 42.566<br>(36.77%)      |
| Japan                      | 62383.5  | 89268.056<br>(143.1%) | 8680.991<br>(13.92%) | -35565.546<br>(-57.01%) |
| Jordan                     | 454.346  | 127.38<br>(28.04%)    | 693.586<br>(152.66%) | -366.62<br>(-80.69%)    |
| Kazakhstan                 | 563.28   | 77.747<br>(13.8%)     | 116.745<br>(20.73%)  | 368.788<br>(65.47%)     |
| Kenya                      | 2430.316 | 20.586<br>(0.85%)     | 2138.875<br>(88.01%) | 270.855<br>(11.14%)     |
| Kiribati                   | 6.106    | 0.169<br>(2.77%)      | 5.803<br>(95.04%)    | 0.134<br>(2.19%)        |
| Kuwait                     | 348.546  | 43.837<br>(12.58%)    | 274.475<br>(78.75%)  | 30.234<br>(8.67%)       |

|                                        |          |                       |                       |                       |
|----------------------------------------|----------|-----------------------|-----------------------|-----------------------|
| Kyrgyzstan                             | 60.697   | 0.296<br>(0.49%)      | 94.01<br>(154.88%)    | -33.609<br>(-55.37%)  |
| Lao People's<br>Democratic<br>Republic | 146.436  | 3.811<br>(2.6%)       | 132.184<br>(90.27%)   | 10.441<br>(7.13%)     |
| Latvia                                 | 561.015  | 203.744<br>(36.32%)   | -167.729<br>(-29.9%)  | 525<br>(93.58%)       |
| Lebanon                                | 687.866  | 158.593<br>(23.06%)   | 642.34<br>(93.38%)    | -113.067<br>(-16.44%) |
| Lesotho                                | 96.767   | -9.334<br>(-9.65%)    | 55.924<br>(57.79%)    | 50.177<br>(51.85%)    |
| Liberia                                | 208.707  | -43.924<br>(-21.05%)  | 260.166<br>(124.66%)  | -7.535<br>(-3.61%)    |
| Libya                                  | 698.274  | 77.921<br>(11.16%)    | 583.694<br>(83.59%)   | 36.659<br>(5.25%)     |
| Lithuania                              | 773.631  | 219.876<br>(28.42%)   | -120.203<br>(-15.54%) | 673.958<br>(87.12%)   |
| Luxembourg                             | 314.739  | 90.782<br>(28.84%)    | 240.668<br>(76.47%)   | -16.711<br>(-5.31%)   |
| Madagascar                             | 1433.507 | -194.304<br>(-13.55%) | 2252.413<br>(157.13%) | -624.602<br>(-43.57%) |
| Malawi                                 | 668.147  | -38.231<br>(-5.72%)   | 711.244<br>(106.45%)  | -4.866<br>(-0.73%)    |
| Malaysia                               | 1896.744 | 409.647<br>(21.6%)    | 1199.162<br>(63.22%)  | 287.935<br>(15.18%)   |
| Maldives                               | 26.788   | 3.553<br>(13.26%)     | 27.027<br>(100.89%)   | -3.792<br>(-14.16%)   |
| Mali                                   | 765.693  | -117.114<br>(-15.3%)  | 895.634<br>(116.97%)  | -12.827<br>(-1.68%)   |
| Malta                                  | 147.824  | 98.952<br>(66.94%)    | 49.955<br>(33.79%)    | -1.083<br>(-0.73%)    |
| Marshall Islands                       | 3.555    | 0.346<br>(9.73%)      | 3.432<br>(96.54%)     | -0.223<br>(-6.27%)    |
| Mauritania                             | 97.719   | 1.493<br>(1.53%)      | 178.533<br>(182.7%)   | -82.307<br>(-84.23%)  |
| Mauritius                              | 91.615   | 38.628<br>(42.16%)    | 62.278<br>(67.98%)    | -9.291<br>(-10.14%)   |
| Mexico                                 | 12699.99 | 4023.195<br>(31.68%)  | 6822.401<br>(53.72%)  | 1854.392<br>(14.6%)   |
| Micronesia<br>(Federated States<br>of) | 3.999    | 0.8<br>(20.01%)       | 3.465<br>(86.65%)     | -0.266<br>(-6.65%)    |
| Monaco                                 | 5.486    | 1.487<br>(27.11%)     | 2.735<br>(49.85%)     | 1.264<br>(23.04%)     |

|                          |          |                        |                       |                        |
|--------------------------|----------|------------------------|-----------------------|------------------------|
| Mongolia                 | 119.533  | 23.308<br>(19.5%)      | 85.053<br>(71.15%)    | 11.172<br>(9.35%)      |
| Montenegro               | 71.804   | 27.009<br>(37.61%)     | 7.773<br>(10.83%)     | 37.022<br>(51.56%)     |
| Morocco                  | 3946.038 | 1046.524<br>(26.52%)   | 2514.958<br>(63.73%)  | 384.556<br>(9.75%)     |
| Mozambique               | 1524.624 | -263.773<br>(-17.3%)   | 1311.518<br>(86.02%)  | 476.879<br>(31.28%)    |
| Myanmar                  | 890.064  | 414.119<br>(46.53%)    | 935.787<br>(105.14%)  | -459.842<br>(-51.66%)  |
| Namibia                  | 118.677  | 9.841<br>(8.29%)       | 105.18<br>(88.63%)    | 3.656<br>(3.08%)       |
| Nauru                    | 0.101    | -0.056<br>(-55.45%)    | 0.221<br>(218.81%)    | -0.064<br>(-63.37%)    |
| Nepal                    | 2134.503 | 470.835<br>(22.06%)    | 1270.001<br>(59.5%)   | 393.667<br>(18.44%)    |
| Netherlands              | 10209.86 | 6666.776<br>(65.3%)    | 2784.294<br>(27.27%)  | 758.791<br>(7.43%)     |
| New Zealand              | 2783.871 | 1626.23<br>(58.42%)    | 1182.254<br>(42.47%)  | -24.613<br>(-0.88%)    |
| Nicaragua                | 224.733  | 53.603<br>(23.85%)     | 222.33<br>(98.93%)    | -51.2<br>(-22.78%)     |
| Niger                    | 756.768  | -17.434<br>(-2.3%)     | 845.209<br>(111.69%)  | -71.007<br>(-9.38%)    |
| Nigeria                  | 4360.301 | -829.092<br>(-19.01%)  | 9519.676<br>(218.33%) | -4330.283<br>(-99.31%) |
| Niue                     | -0.128   | 0.01<br>(-7.81%)       | -0.071<br>(55.47%)    | -0.067<br>(52.34%)     |
| North Macedonia          | 292.834  | 89.403<br>(30.53%)     | 55.958<br>(19.11%)    | 147.473<br>(50.36%)    |
| Northern Mariana Islands | 10.294   | 4.706<br>(45.72%)      | 1.096<br>(10.65%)     | 4.492<br>(43.64%)      |
| Norway                   | 1550.675 | 687.46<br>(44.33%)     | 1532.62<br>(98.84%)   | -669.405<br>(-43.17%)  |
| Oman                     | 402.569  | -33.468<br>(-8.31%)    | 509.763<br>(126.63%)  | -73.726<br>(-18.31%)   |
| Pakistan                 | 11660.71 | -1797.358<br>(-15.41%) | 10410.433<br>(89.28%) | 3047.636<br>(26.14%)   |
| Palau                    | 0.649    | 0.286<br>(44.07%)      | 0.337<br>(51.93%)     | 0.026<br>(4.01%)       |
| Palestine                | 144.418  | 1.472<br>(1.02%)       | 154.755<br>(107.16%)  | -11.809<br>(-8.18%)    |
| Panama                   | 143.477  | 103.191<br>(71.92%)    | 291.277<br>(203.01%)  | -250.991<br>(-174.93%) |

|                                     |          |                      |                       |                        |
|-------------------------------------|----------|----------------------|-----------------------|------------------------|
| Papua New Guinea                    | 532.032  | 2.035<br>(0.38%)     | 491.595<br>(92.4%)    | 38.402<br>(7.22%)      |
| Paraguay                            | 1830.163 | 207.94<br>(11.36%)   | 914.343<br>(49.96%)   | 707.88<br>(38.68%)     |
| Peru                                | 717.872  | 489.9<br>(68.24%)    | 1367.222<br>(190.45%) | -1139.25<br>(-158.7%)  |
| Philippines                         | 2859.789 | 384.587<br>(13.45%)  | 1285.467<br>(44.95%)  | 1189.735<br>(41.6%)    |
| Poland                              | 23725.74 | 4381.143<br>(18.47%) | 1626.527<br>(6.86%)   | 17718.066<br>(74.68%)  |
| Portugal                            | 8264.536 | 3226.473<br>(39.04%) | 960.52<br>(11.62%)    | 4077.543<br>(49.34%)   |
| Puerto Rico                         | 678.241  | 615.396<br>(90.73%)  | 172.666<br>(25.46%)   | -109.821<br>(-16.19%)  |
| Qatar                               | 132.151  | 4.5<br>(3.41%)       | 198.184<br>(149.97%)  | -70.533<br>(-53.37%)   |
| Republic of Korea                   | 8268.765 | 4916.616<br>(59.46%) | 2118.416<br>(25.62%)  | 1233.733<br>(14.92%)   |
| Republic of<br>Moldova              | 191.413  | 74.167<br>(38.75%)   | -9.279<br>(-4.85%)    | 126.525<br>(66.1%)     |
| Romania                             | 5402.012 | 2332.243<br>(43.17%) | -608.702<br>(-11.27%) | 3678.471<br>(68.09%)   |
| Russian Federation                  | 25491.82 | 4613.278<br>(18.1%)  | 641.582<br>(2.52%)    | 20236.955<br>(79.39%)  |
| Rwanda                              | 321.075  | 21.374<br>(6.66%)    | 745.546<br>(232.2%)   | -445.845<br>(-138.86%) |
| Saint Kitts and<br>Nevis            | 3.968    | -0.05<br>(-1.26%)    | 6.372<br>(160.58%)    | -2.354<br>(-59.32%)    |
| Saint Lucia                         | 20.989   | 9.673<br>(46.09%)    | 15.406<br>(73.4%)     | -4.09<br>(-19.49%)     |
| Saint Vincent and<br>the Grenadines | 3.219    | 8.436<br>(262.07%)   | 7.421<br>(230.54%)    | -12.638<br>(-392.61%)  |
| Samoa                               | 6.988    | 2.163<br>(30.95%)    | 8.59<br>(122.93%)     | -3.765<br>(-53.88%)    |
| San Marino                          | 15.339   | 6.453<br>(42.07%)    | 5.293<br>(34.51%)     | 3.593<br>(23.42%)      |
| Sao Tome and<br>Principe            | 11.913   | -0.59<br>(-4.95%)    | 8.482<br>(71.2%)      | 4.021<br>(33.75%)      |
| Saudi Arabia                        | 2402.887 | 112.379<br>(4.68%)   | 1877.676<br>(78.14%)  | 412.832<br>(17.18%)    |
| Senegal                             | 658.863  | 29.568<br>(4.49%)    | 621.765<br>(94.37%)   | 7.53<br>(1.14%)        |
| Serbia                              | 5153.818 | 1971.615<br>(38.26%) | -2.641<br>(-0.05%)    | 3184.844<br>(61.8%)    |

|                               |          |                       |                       |                         |
|-------------------------------|----------|-----------------------|-----------------------|-------------------------|
| Seychelles                    | 7.632    | 1.512<br>(19.81%)     | 5.43<br>(71.15%)      | 0.69<br>(9.04%)         |
| Sierra Leone                  | 372.544  | -56.103<br>(-15.06%)  | 376.869<br>(101.16%)  | 51.778<br>(13.9%)       |
| Singapore                     | 488.765  | 309.096<br>(63.24%)   | 437.974<br>(89.61%)   | -258.305<br>(-52.85%)   |
| Slovakia                      | 2251.404 | 366.666<br>(16.29%)   | 219.891<br>(9.77%)    | 1664.847<br>(73.95%)    |
| Slovenia                      | 3475.605 | 1329.861<br>(38.26%)  | 304.284<br>(8.75%)    | 1841.46<br>(52.98%)     |
| Solomon Islands               | 42.133   | 2.683<br>(6.37%)      | 41.443<br>(98.36%)    | -1.993<br>(-4.73%)      |
| Somalia                       | 619.362  | -81.841<br>(-13.21%)  | 1025.592<br>(165.59%) | -324.389<br>(-52.37%)   |
| South Africa                  | 2876.814 | 883.997<br>(30.73%)   | 3274.827<br>(113.84%) | -1282.01<br>(-44.56%)   |
| South Sudan                   | 39.794   | 6.291<br>(15.81%)     | 210.759<br>(529.63%)  | -177.256<br>(-445.43%)  |
| Spain                         | 28431.12 | 16769.687<br>(58.98%) | 9856.844<br>(34.67%)  | 1804.592<br>(6.35%)     |
| Sri Lanka                     | 1183.799 | 1149.232<br>(97.08%)  | 1076.141<br>(90.91%)  | -1041.574<br>(-87.99%)  |
| Sudan                         | 2581.238 | -173.675<br>(-6.73%)  | 2815.404<br>(109.07%) | -60.491<br>(-2.34%)     |
| Suriname                      | 61.205   | 17.166<br>(28.05%)    | 38.616<br>(63.09%)    | 5.423<br>(8.86%)        |
| Sweden                        | 3684.033 | 2130.522<br>(57.83%)  | 1949.826<br>(52.93%)  | -396.315<br>(-10.76%)   |
| Switzerland                   | 2863.019 | 1958.267<br>(68.4%)   | 1700.703<br>(59.4%)   | -795.951<br>(-27.8%)    |
| Syrian Arab<br>Republic       | 360.665  | 1267.341<br>(351.39%) | 2049.023<br>(568.12%) | -2955.699<br>(-819.51%) |
| Taiwan (Province<br>of China) | 3725.006 | 1926.297<br>(51.71%)  | 930.614<br>(24.98%)   | 868.095<br>(23.3%)      |
| Tajikistan                    | 169.57   | -6.645<br>(-3.92%)    | 143.197<br>(84.45%)   | 33.018<br>(19.47%)      |
| Thailand                      | 4360.291 | 2243.186<br>(51.45%)  | 1654.239<br>(37.94%)  | 462.866<br>(10.62%)     |
| Timor-Leste                   | 29.875   | 8.239<br>(27.58%)     | 14.199<br>(47.53%)    | 7.437<br>(24.89%)       |
| Togo                          | 515.028  | 64.865<br>(12.59%)    | 411.11<br>(79.82%)    | 39.053<br>(7.58%)       |
| Tokelau                       | -0.039   | -0.01<br>(25.64%)     | -0.01<br>(25.64%)     | -0.019<br>(48.72%)      |

|                                    |          |                       |                       |                         |
|------------------------------------|----------|-----------------------|-----------------------|-------------------------|
| Tonga                              | 3.721    | 1.916<br>(51.49%)     | 1.791<br>(48.13%)     | 0.014<br>(0.38%)        |
| Trinidad and Tobago                | 106.89   | 56.552<br>(52.91%)    | 62.641<br>(58.6%)     | -12.303<br>(-11.51%)    |
| Tunisia                            | 1424.678 | 520.713<br>(36.55%)   | 930.332<br>(65.3%)    | -26.367<br>(-1.85%)     |
| Turkey                             | 5474.926 | 4493.526<br>(82.07%)  | 7726.079<br>(141.12%) | -6744.679<br>(-123.19%) |
| Turkmenistan                       | 141.425  | 22.58<br>(15.97%)     | 64.585<br>(45.67%)    | 54.26<br>(38.37%)       |
| Tuvalu                             | 0.513    | 0.128<br>(24.95%)     | 0.596<br>(116.18%)    | -0.211<br>(-41.13%)     |
| Uganda                             | 1471.112 | -159.751<br>(-10.86%) | 1615.385<br>(109.81%) | 15.478<br>(1.05%)       |
| Ukraine                            | 3246.152 | 608.453<br>(18.74%)   | -436.951<br>(-13.46%) | 3074.65<br>(94.72%)     |
| United Arab Emirates               | 1907.256 | 263.067<br>(13.79%)   | 1624.764<br>(85.19%)  | 19.425<br>(1.02%)       |
| United Kingdom                     | 21264.79 | 10778.611<br>(50.69%) | 9894.775<br>(46.53%)  | 591.399<br>(2.78%)      |
| United Republic of Tanzania        | 2389.637 | -26.763<br>(-1.12%)   | 3082.729<br>(129%)    | -666.329<br>(-27.88%)   |
| United States of America           | 92794.01 | 61554.256<br>(66.33%) | 71798.223<br>(77.37%) | -40558.471<br>(-43.71%) |
| United States Virgin Islands       | 37.247   | 27.539<br>(73.94%)    | 6.634<br>(17.81%)     | 3.074<br>(8.25%)        |
| Uruguay                            | 2181.516 | 777.538<br>(35.64%)   | 509.935<br>(23.38%)   | 894.043<br>(40.98%)     |
| Uzbekistan                         | 1649.588 | -40.143<br>(-2.43%)   | 604.672<br>(36.66%)   | 1085.059<br>(65.78%)    |
| Vanuatu                            | 23.919   | 2.171<br>(9.08%)      | 18.961<br>(79.27%)    | 2.787<br>(11.65%)       |
| Venezuela (Bolivarian Republic of) | 3886.955 | 1592.637<br>(40.97%)  | 2325.503<br>(59.83%)  | -31.185<br>(-0.8%)      |
| Viet Nam                           | 3002.644 | 951.604<br>(31.69%)   | 2376.748<br>(79.16%)  | -325.708<br>(-10.85%)   |
| Yemen                              | 2364.37  | -16.566<br>(-0.7%)    | 2300.93<br>(97.32%)   | 80.006<br>(3.38%)       |
| Zambia                             | 1187.462 | -36.201<br>(-3.05%)   | 913.987<br>(76.97%)   | 309.676<br>(26.08%)     |
| Zimbabwe                           | 691.344  | 42.029<br>(6.08%)     | 474.854<br>(68.69%)   | 174.461<br>(25.24%)     |

a.Change in DALYs number between year 2019 and 1990.

b.Change in DALYs number due to change in the age structure.

c.Change in DALYs number due to change in population number.

d.Change in DALYs number due to epidemiologic changes. Epidemiologic changes refer to the DALYs number change when age structure and population hold constant.

DALYs, Disability-Adjusted Life Years; SDI: Socio-demographic index.
