# Supplementary material for: Global Burden and Improvement Gap of Non-Rheumatic Calcific Aortic Valve Disease: 1990–2019 Findings from Global Burden of Disease Study 2019
Source: MDPI journal article supplement (doi:10.3390/jcm11226733), 2022-11-14
Supplement: s1 [file s1]

Table S2. The incidence cases and age-standardized incidence rate of non-rheumatic calcific aortic valve disease in 1990 and 2019 and its temporal trends from 1990 to 2019.

|                      | 1990                         |                           | 2019                         |                           | 1990–2019                    | 1990–2019              |
|----------------------|------------------------------|---------------------------|------------------------------|---------------------------|------------------------------|------------------------|
|                      | Cases                        | ASIR (per 100,000)        | Cases                        | ASIR (per 100,000)        | ASIR Percentage change       | AAPC                   |
|                      | No. (95% UI)                 | No. (95% UI)              | No. (95% UI)                 | No. (95% UI)              | (ASIR, 95% UI)               | No. (95% CI)           |
| Global               | 130822<br>(110701 to 156022) | 3.25<br>(2.76 to 3.86)    | 589638<br>(512895 to 677062) | 7.13<br>(6.22 to 8.15)    | 119.24<br>(108.72 to 131.69) | 2.85<br>(2.44 to 3.26) |
| Female               | 61178<br>(50969 to 73841)    | 2.88<br>(2.41 to 3.45)    | 275833<br>(239867 to 317136) | 6.31<br>(5.49 to 7.26)    | 119.27<br>(107.45 to 134.6)  | 2.9<br>(2.58 to 3.22)  |
| Male                 | 69644<br>(59317 to 82577)    | 3.63<br>(3.11 to 4.27)    | 313805<br>(271313 to 360915) | 7.95<br>(6.92 to 9.09)    | 119.05<br>(108.57 to 130.95) | 2.82<br>(2.37 to 3.27) |
| High SDI             | 92683<br>(76421 to 112271)   | 9.18<br>(7.65 to 11.05)   | 329823<br>(285980 to 381248) | 19.04<br>(16.65 to 21.96) | 107.46<br>(94.77 to 121.84)  | 2.63<br>(2.19 to 3.08) |
| High-middle SDI      | 26389<br>(22287 to 31007)    | 2.4<br>(2.04 to 2.79)     | 193217<br>(163540 to 225654) | 9.59<br>(8.14 to 11.18)   | 298.74<br>(283.11 to 316)    | 4.95<br>(4.72 to 5.19) |
| Middle SDI           | 6192<br>(5244 to 7327)       | 0.63<br>(0.54 to 0.73)    | 49938<br>(41587 to 59436)    | 1.89<br>(1.59 to 2.23)    | 182.34<br>(156.46 to 215.14) | 3.86<br>(3.66 to 4.06) |
| Low-middle SDI       | 3905<br>(3335 to 4608)       | 0.77<br>(0.66 to 0.9)     | 12597<br>(10820 to 14600)    | 0.98<br>(0.85 to 1.14)    | 26.78<br>(23.12 to 31.13)    | 0.83<br>(0.76 to 0.9)  |
| Low SDI              | 1618<br>(1390 to 1879)       | 0.82<br>(0.71 to 0.94)    | 3860<br>(3343 to 4455)       | 0.84<br>(0.73 to 0.97)    | -3.56<br>(-5.15 to -1.93)    | 0.1<br>(0.07 to 0.14)  |
| High-income          | 30473<br>(25249 to 36916)    | 15.12<br>(12.61 to 18.17) | 88601<br>(73613 to 107125)   | 25.04<br>(21.32 to 29.6)  | 65.55<br>(55.74 to 75.72)    | 1.76<br>(1.68 to 1.85) |
| Asia Pacific         | 48905<br>(39764 to 59971)    | 14.32<br>(11.71 to 17.4)  | 123568<br>(106451 to 142325) | 20.23<br>(17.61 to 23.2)  | 41.24<br>(25.04 to 60.36)    | 2.21<br>(1.21 to 3.23) |
| High-income          | 15951<br>(13209 to 19243)    | 2.96<br>(2.46 to 3.57)    | 116514<br>(98950 to 138347)  | 14.9<br>(12.77 to 17.56)  | 403.33<br>(367.91 to 444.76) | 6.12<br>(5.55 to 6.69) |
| North America        | 1260<br>(1103 to 1452)       | 5.56<br>(4.9 to 6.32)     | 20173<br>(17134 to 23512)    | 44.39<br>(38.08 to 51.79) | 698.05<br>(597.68 to 830.16) | 7.46<br>(7.31 to 7.61) |
| Western Europe       | 152<br>(134 to 173)          | 0.72<br>(0.65 to 0.81)    | 2147<br>(1861 to 2465)       | 3.62<br>(3.14 to 4.16)    | 400.47<br>(344.34 to 463.24) | 6.12<br>(5.63 to 6.6)  |
| Australasia          |                              |                           |                              |                           |                              |                        |
| Andean Latin America |                              |                           |                              |                           |                              |                        |

|                              |       |                         |                        |                           |                           |                              |                        |
|------------------------------|-------|-------------------------|------------------------|---------------------------|---------------------------|------------------------------|------------------------|
| Tropical America             | Latin | 1950<br>(1674 to 2279)  | 2.22<br>(1.91 to 2.57) | 6585<br>(5610 to 7682)    | 2.71<br>(2.31 to 3.15)    | 21.64<br>(14.55 to 30.02)    | 0.65<br>(0.57 to 0.73) |
| Central America              | Latin | 1051<br>(916 to 1201)   | 1.19<br>(1.05 to 1.35) | 5750<br>(4954 to 6617)    | 2.29<br>(1.99 to 2.63)    | 93.42<br>(78.8 to 108.5)     | 2.39<br>(1.53 to 3.26) |
| Southern America             | Latin | 1088<br>(897 to 1431)   | 2.59<br>(2.13 to 3.46) | 8727<br>(7730 to 9923)    | 10.64<br>(9.44 to 12.08)  | 311.48<br>(214.61 to 401.02) | 4.93<br>(4.51 to 5.35) |
| Caribbean                    |       | 443<br>(398 to 493)     | 1.7<br>(1.53 to 1.88)  | 2350<br>(2015 to 2734)    | 4.49<br>(3.86 to 5.21)    | 164.97<br>(135.37 to 193.6)  | 3.52<br>(3.24 to 3.81) |
| Central Europe               |       | 9801<br>(8263 to 11497) | 6.59<br>(5.52 to 7.69) | 57281<br>(48866 to 67322) | 33.16<br>(28.29 to 38.67) | 403.37<br>(358.25 to 448.46) | 6.11<br>(5.72 to 6.5)  |
| Eastern Europe               |       | 7933<br>(6360 to 9591)  | 2.9<br>(2.34 to 3.48)  | 68415<br>(55228 to 82915) | 22.58<br>(18.38 to 27.04) | 678.78<br>(631.44 to 732.11) | 7.51<br>(7.3 to 7.72)  |
| Central Asia                 |       | 330<br>(268 to 403)     | 0.66<br>(0.54 to 0.8)  | 2645<br>(2183 to 3113)    | 2.86<br>(2.37 to 3.35)    | 335.57<br>(282.18 to 389.39) | 5.16<br>(4.96 to 5.36) |
| North Africa and Middle East |       | 2036<br>(1746 to 2369)  | 1.19<br>(1.04 to 1.36) | 7070<br>(5978 to 8346)    | 1.46<br>(1.27 to 1.69)    | 22.68<br>(16.65 to 29.87)    | 0.99<br>(0.59 to 1.4)  |
| South Asia                   |       | 4129<br>(3483 to 4942)  | 0.93<br>(0.79 to 1.09) | 12370<br>(10486 to 14621) | 1.01<br>(0.85 to 1.18)    | 7.86<br>(5.96 to 9.56)       | 0.29<br>(0.23 to 0.35) |
| Southeast Asia               |       | 713<br>(593 to 862)     | 0.32<br>(0.27 to 0.38) | 3295<br>(2778 to 3940)    | 0.54<br>(0.46 to 0.64)    | 69.72<br>(56.21 to 84.64)    | 1.85<br>(1.8 to 1.89)  |
| East Asia                    |       | 2971<br>(2366 to 3782)  | 0.34<br>(0.28 to 0.42) | 56641<br>(45299 to 69328) | 2.61<br>(2.11 to 3.15)    | 665.55<br>(544.2 to 807.08)  | 7.18<br>(6.96 to 7.41) |
| Oceania                      |       | 28<br>(24 to 33)        | 1.07<br>(0.91 to 1.26) | 130<br>(109 to 153)       | 1.73<br>(1.47 to 2.04)    | 61.9<br>(46.07 to 80.31)     | 1.42<br>(1.13 to 1.71) |
| Western Sub-Saharan Africa   |       | 505<br>(429 to 597)     | 0.57<br>(0.49 to 0.66) | 1160<br>(992 to 1365)     | 0.58<br>(0.5 to 0.67)     | 1.73<br>(-0.39 to 3.81)      | 0.08<br>(0.05 to 0.1)  |
| Eastern Sub-Saharan Africa   |       | 500<br>(433 to 575)     | 0.83<br>(0.74 to 0.95) | 1166<br>(1015 to 1351)    | 0.84<br>(0.73 to 0.96)    | 0.6<br>(-1.77 to 3.41)       | 0.05<br>(0.01 to 0.09) |

|                                   |                     |                        |                        |                       |                              |                        |
|-----------------------------------|---------------------|------------------------|------------------------|-----------------------|------------------------------|------------------------|
| Central<br>Sub-Saharan<br>Africa  | 163<br>(142 to 187) | 0.94<br>(0.84 to 1.06) | 411<br>(360 to 472)    | 0.97<br>(0.87 to 1.1) | 3.47<br>(-0.48 to 6.92)      | 0.15<br>(0.11 to 0.19) |
| Southern<br>Sub-Saharan<br>Africa | 441<br>(374 to 516) | 1.62<br>(1.38 to 1.91) | 4637<br>(3717 to 5702) | 7.09<br>(5.73 to 8.6) | 337.49<br>(269.44 to 416.62) | 5.68<br>(5.08 to 6.28) |

---

AAPC, average annual percentage change; ASIR, age-standardised incidence rates; SDI, sociodemographic index; UI, uncertainty interval; CI, confidence interval.
