# Supplementary material for: Global Burden and Improvement Gap of Non-Rheumatic Calcific Aortic Valve Disease: 1990–2019 Findings from Global Burden of Disease Study 2019
Source: J Clin Med. 2022 Nov 14;11(22):6733. doi: 10.3390/jcm11226733 (PMC9698619; doi:10.3390/jcm11226733)
Supplement: Supplementary file 1 [file jcm-11-06733-s001.zip]

Archive with 12 entries (12 files):
- Figure S1.pdf
- Figure S2.pdf
- Figure S3.pdf
- Figure S4.pdf
- Supplemental Table S1 nrCAVD prevalence in 204 countries.pdf
- Supplemental Table S2 incidence calcific aortic valve disease.pdf
- Supplemental Table S3 DALYs calcific aortic valve disease.pdf
- Supplemental Table S4 death calcific aortic valve disease.pdf
- Supplemental Table S5 Decomposition.pdf
- Supplemental Table S6 frontier.pdf
- Supplementary Figure legends nrCAVD.pdf
- Supplementary methods.pdf
