# Supplementary figures and images for: Global Burden and Improvement Gap of Non-Rheumatic Calcific Aortic Valve Disease: 1990–2019 Findings from Global Burden of Disease Study 2019
Source: MDPI journal article supplement (doi:10.3390/jcm11226733), 2022-11-14

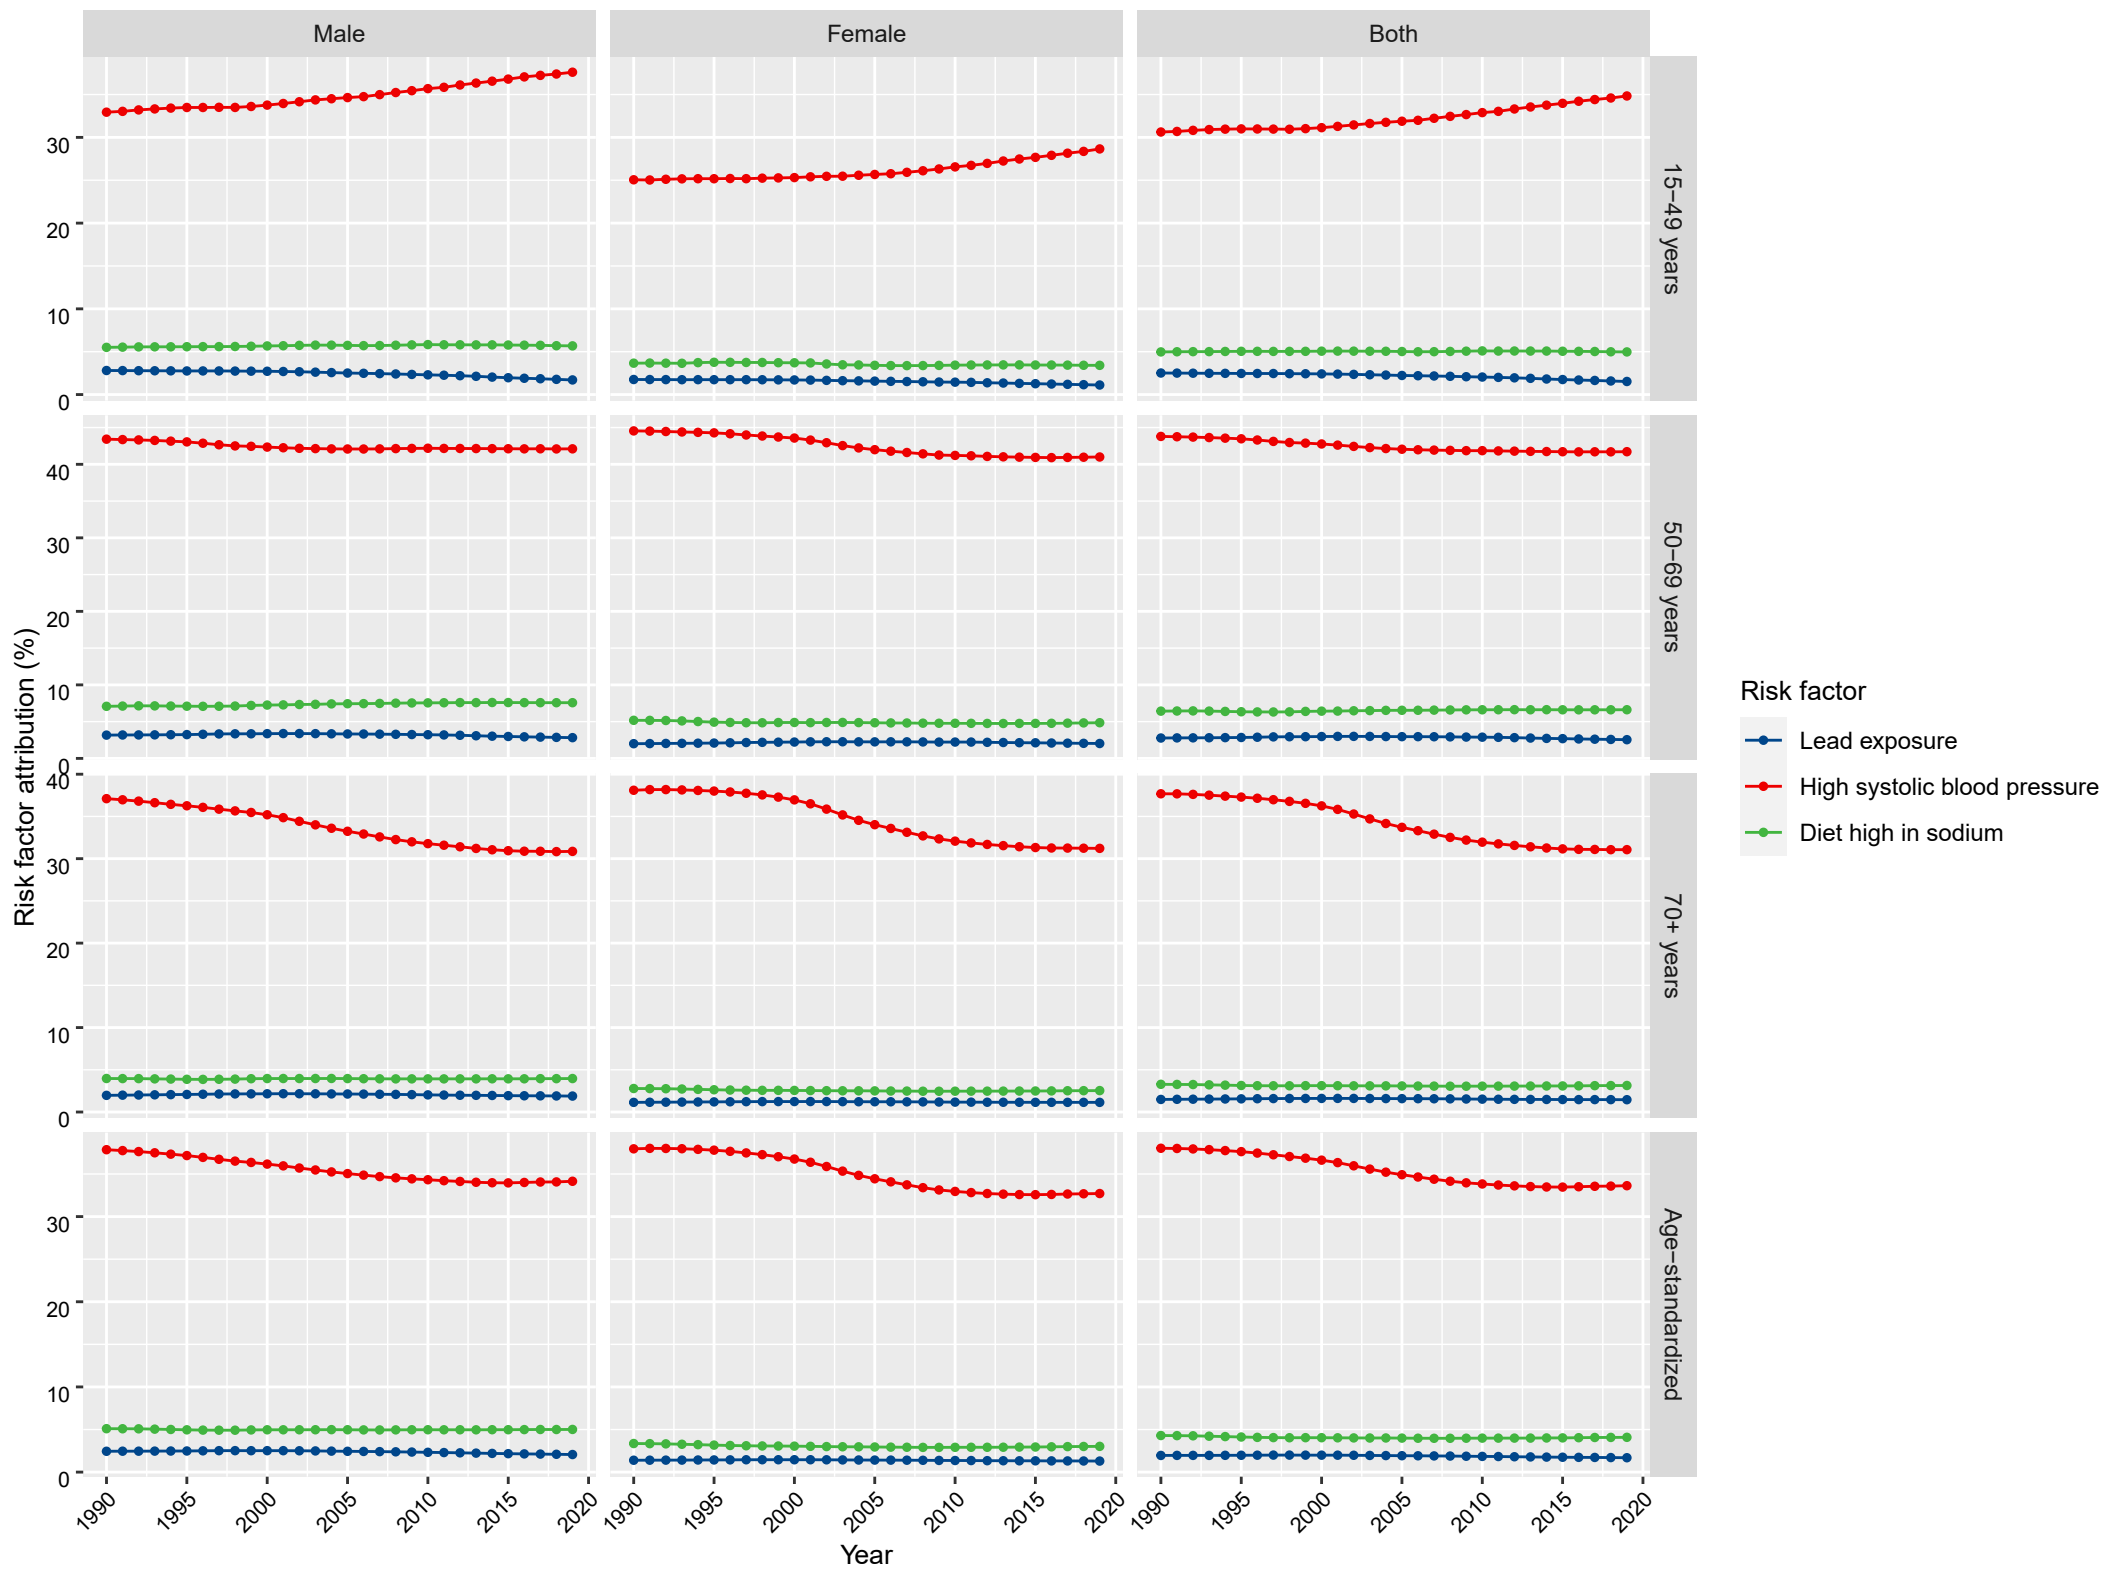

Supplement: s1 [file s1]

D

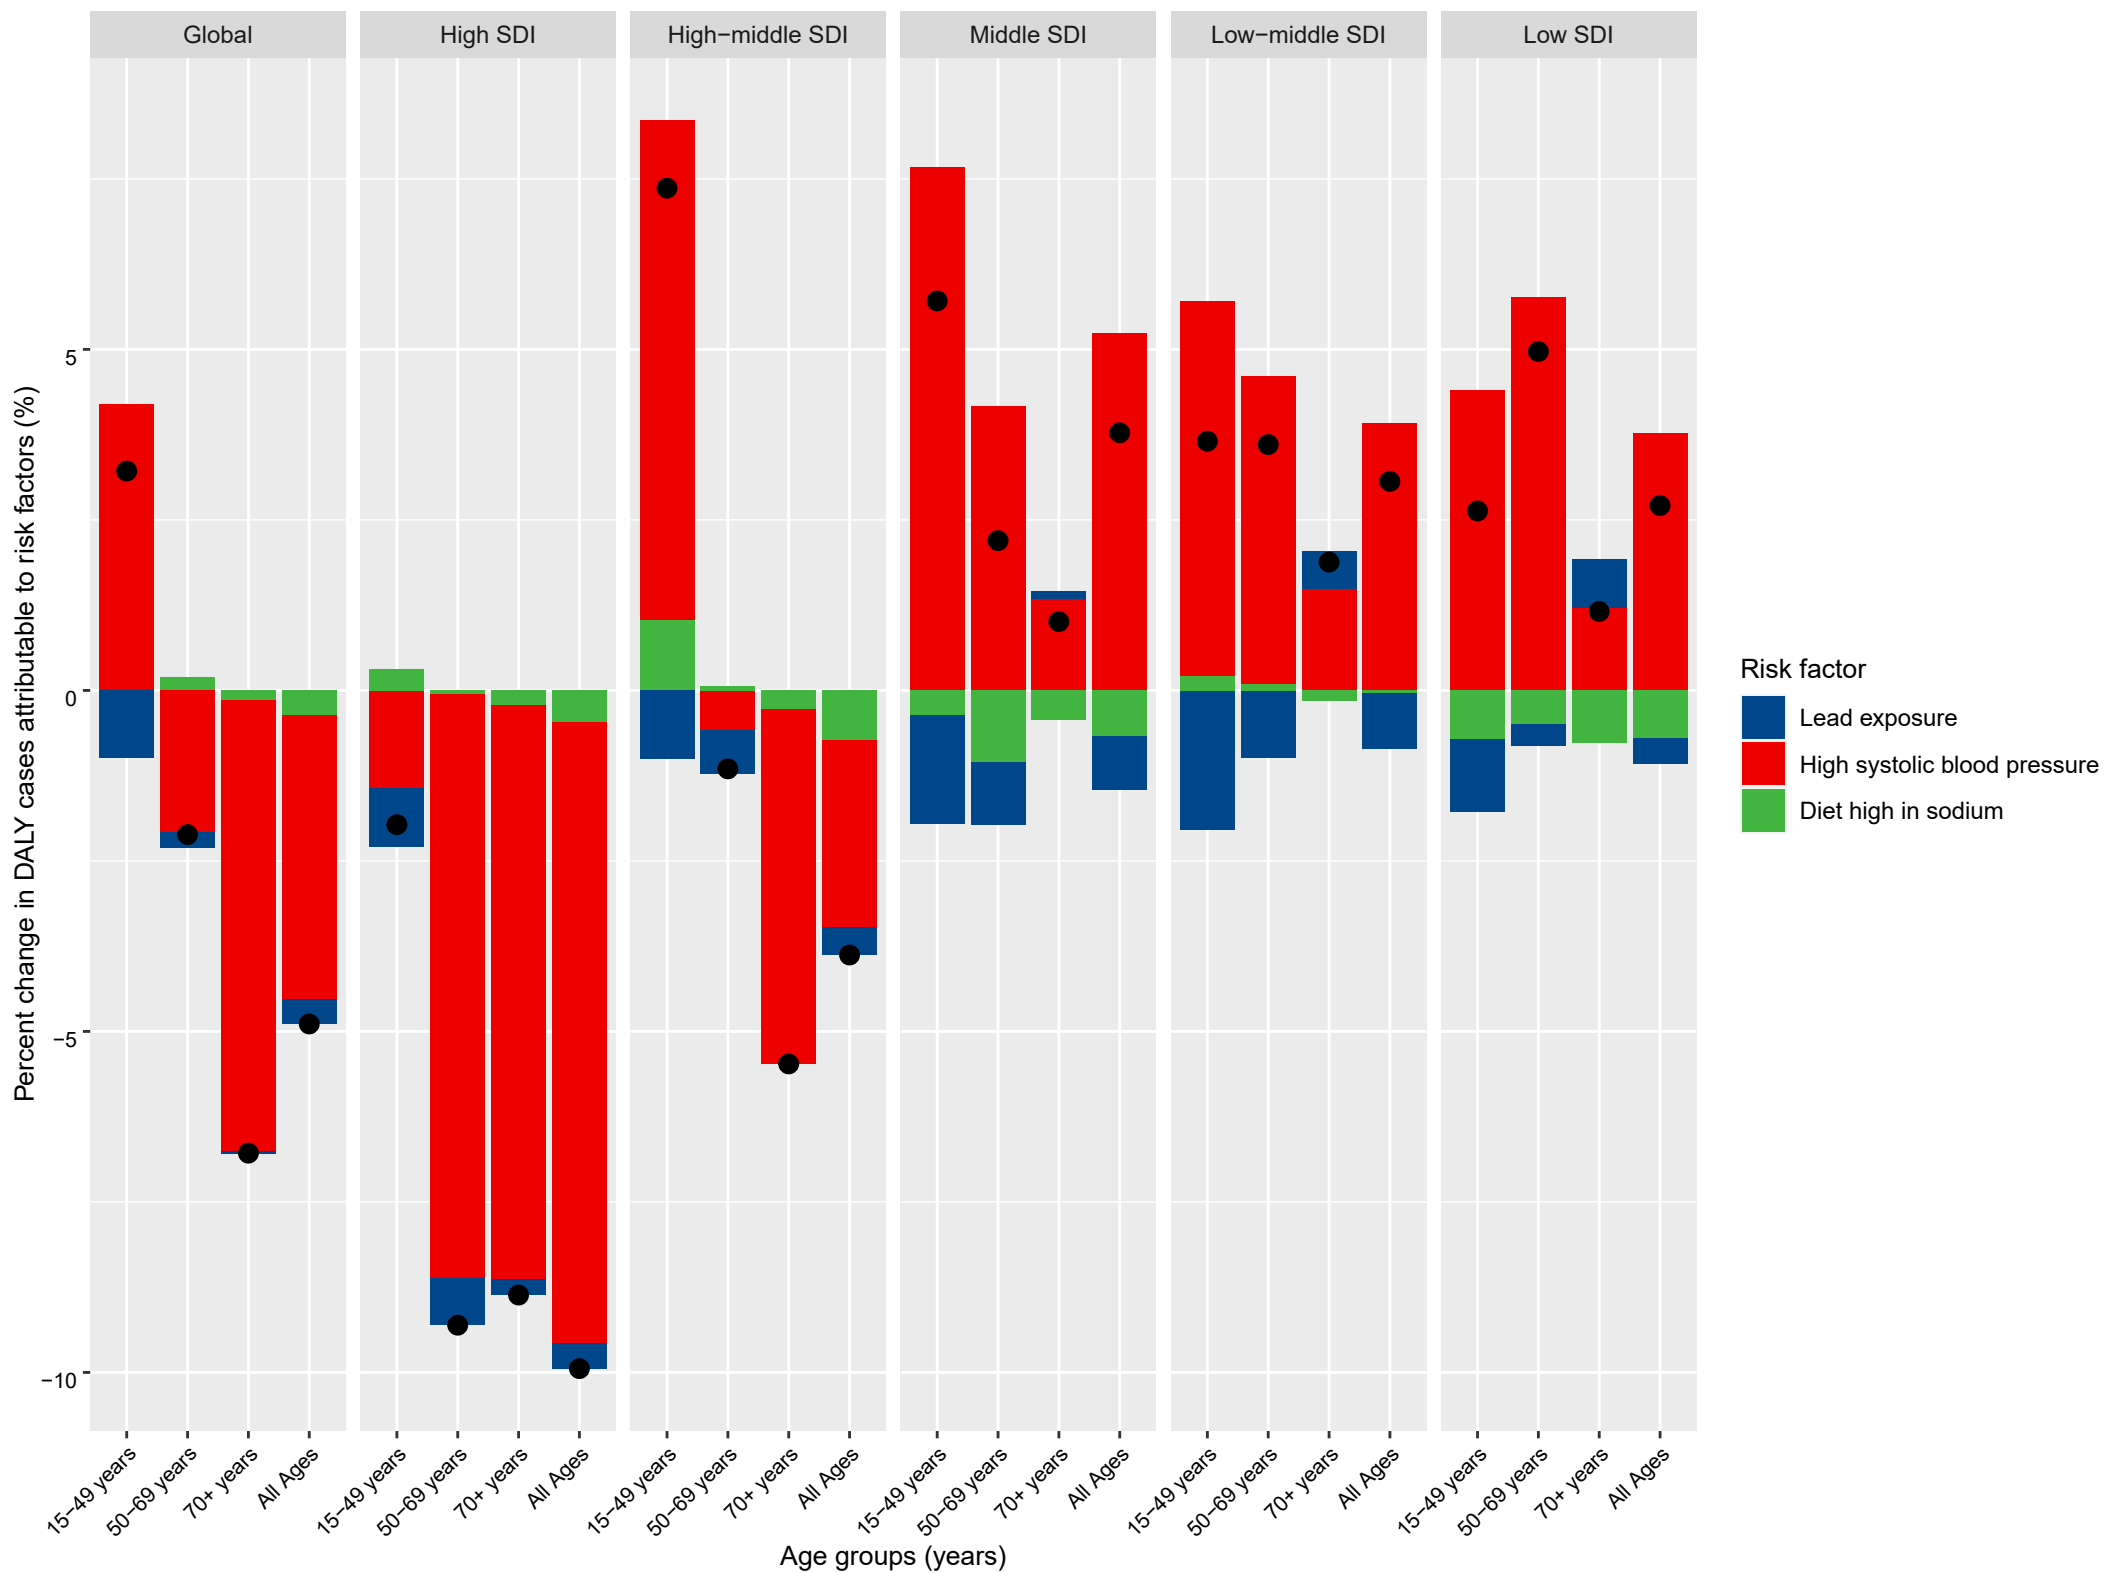

Supplement: s1 [file s1]

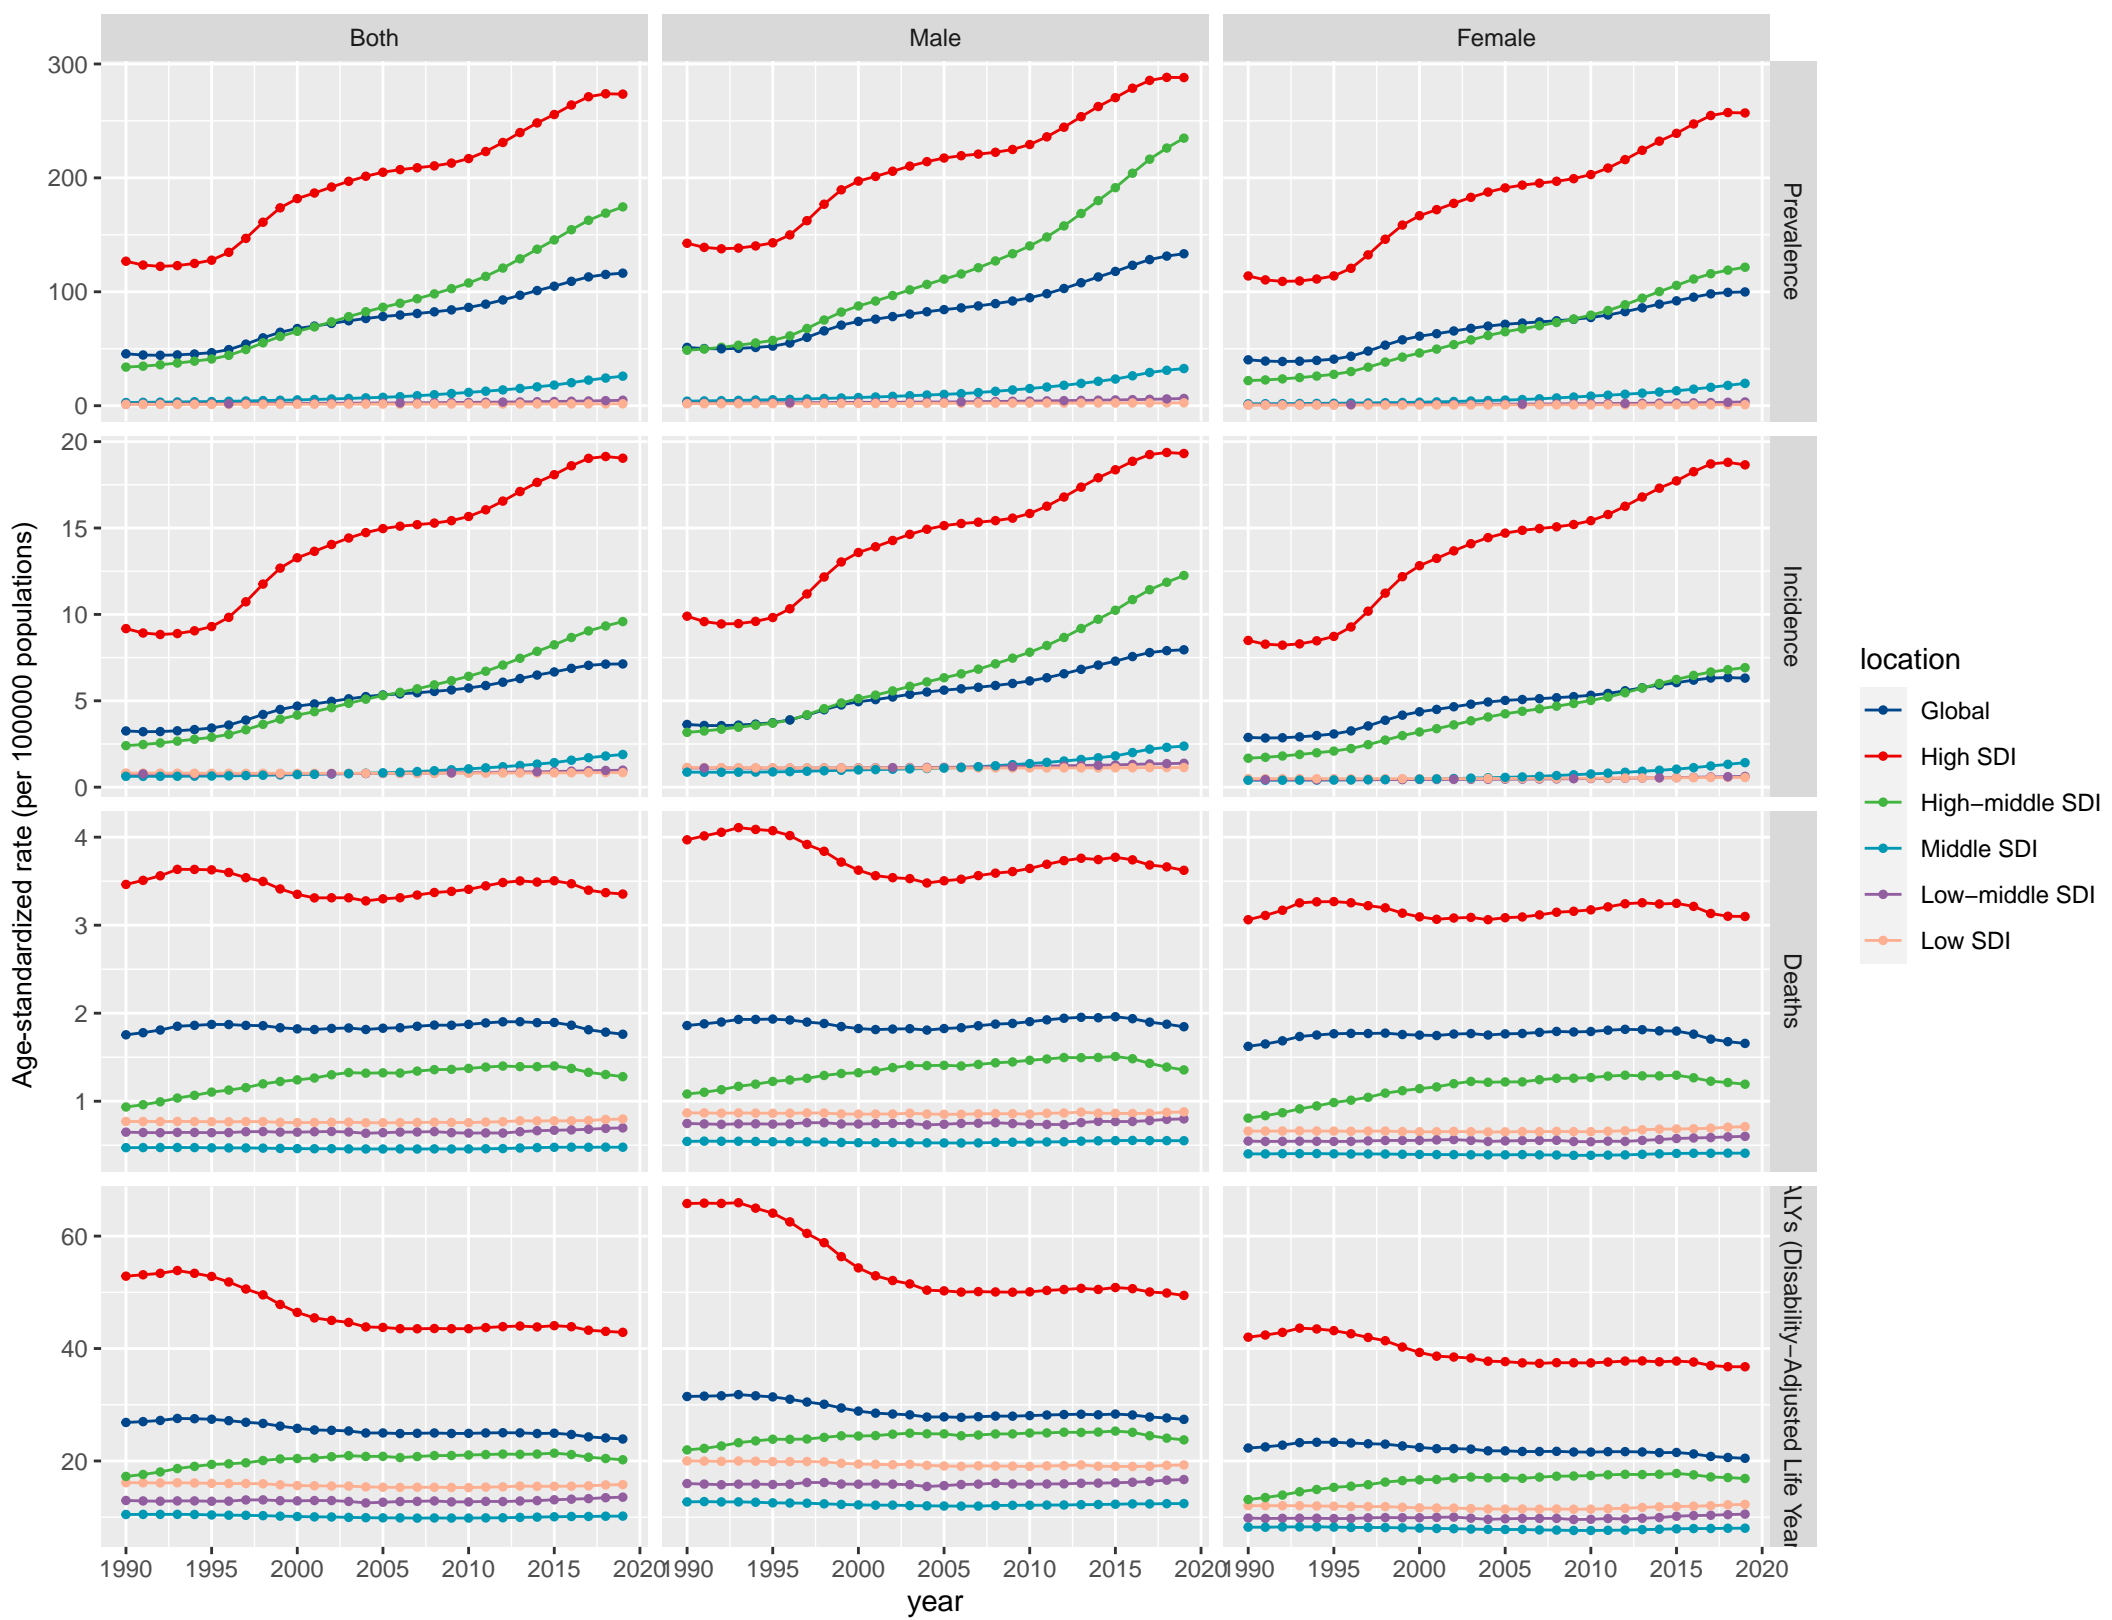

Supplement: s1 [file s1]

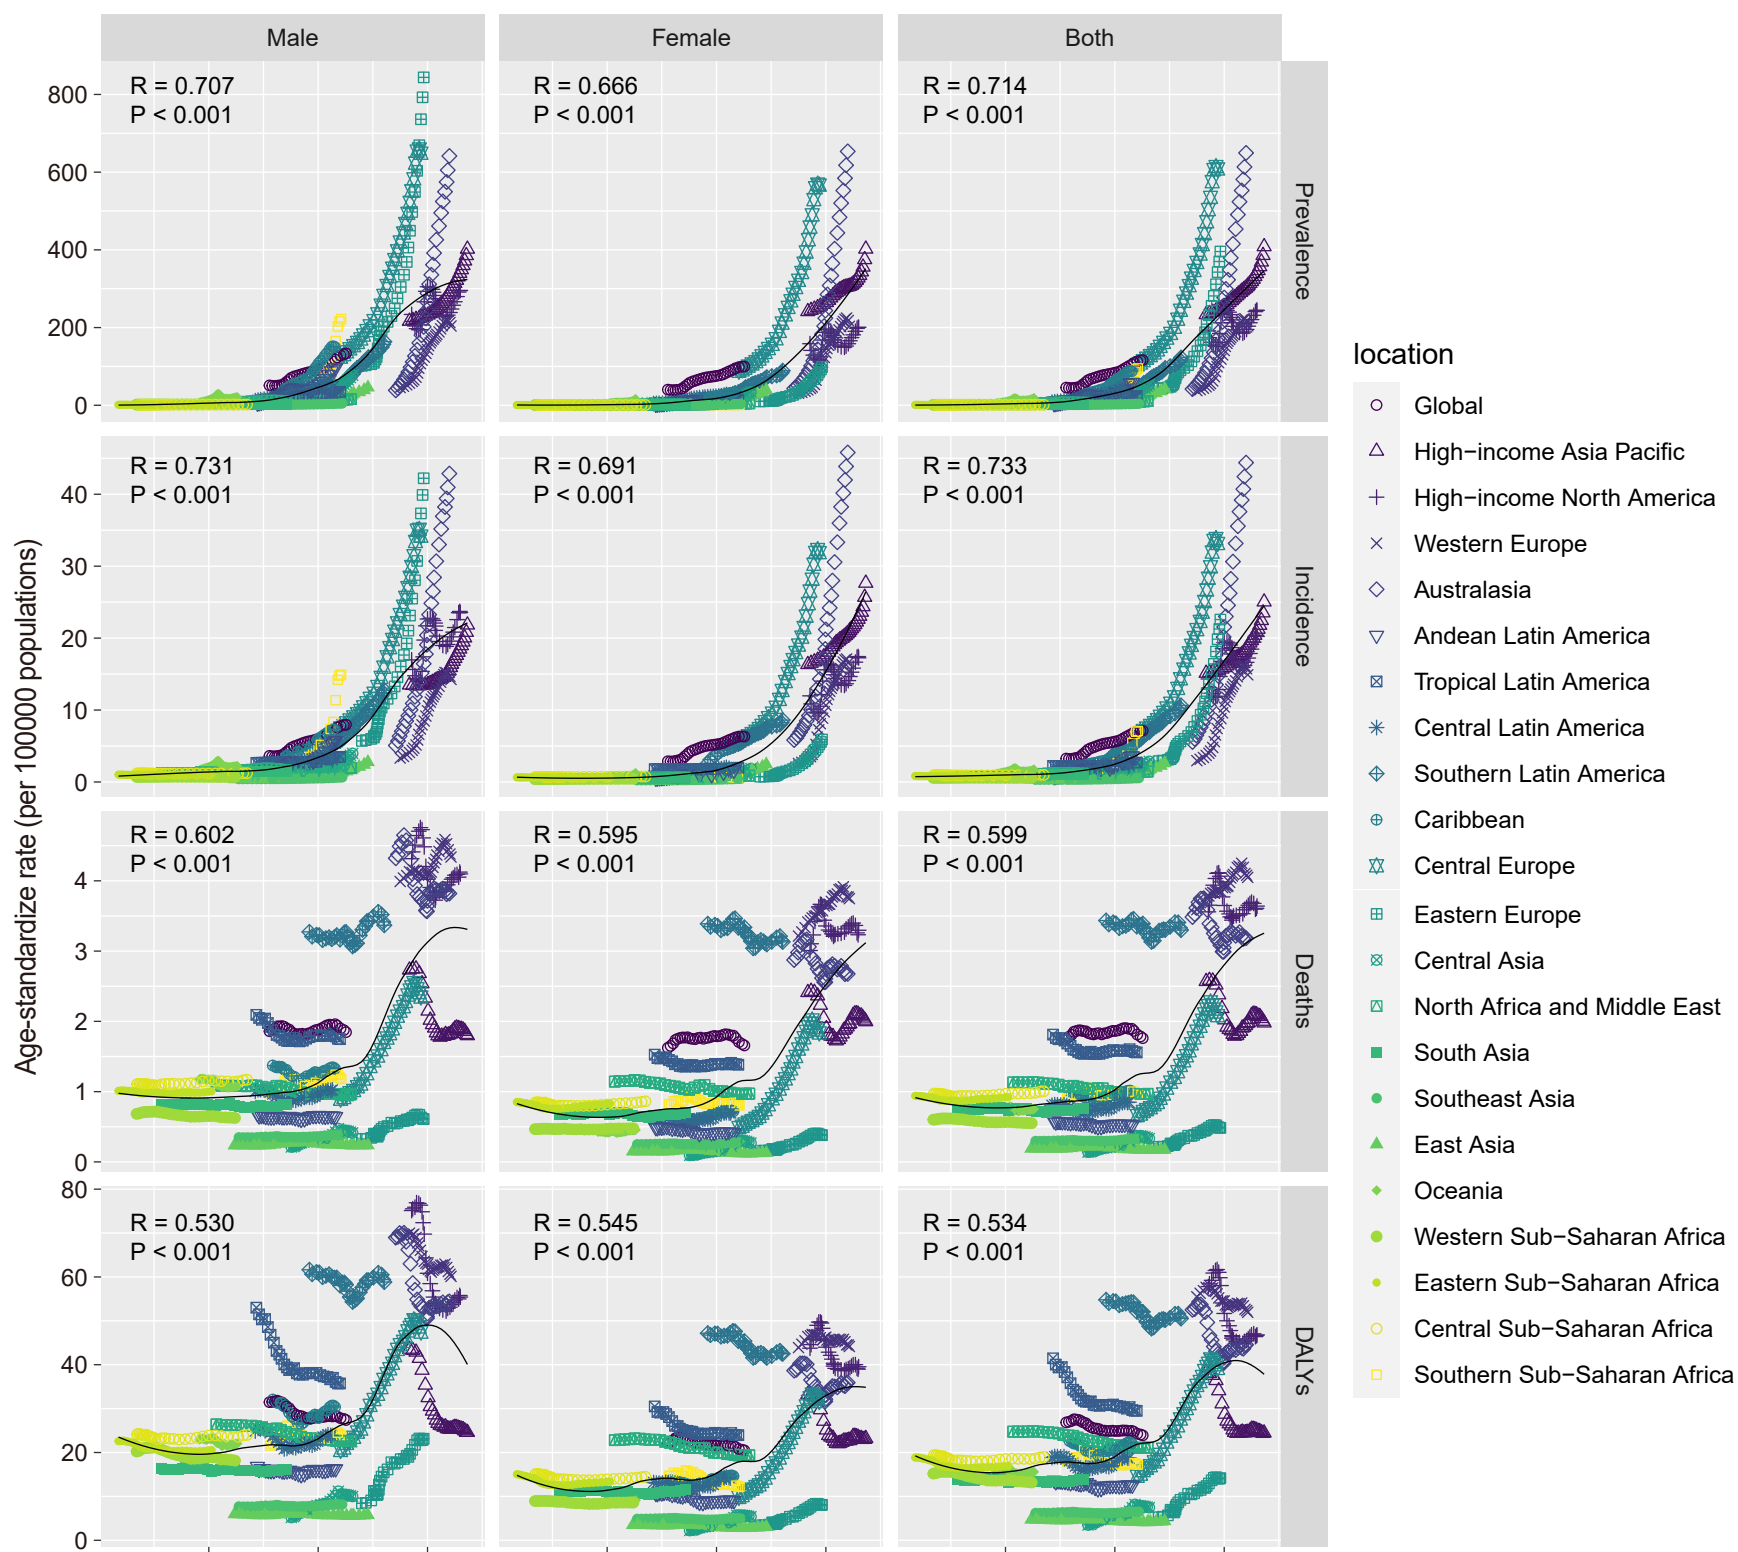

Supplement: s1 [file s1]
